# Supplementary material for: Road mortality of water snakes in light of landscape structure and traffic intensity in north-eastern Hungary
Source: PeerJ journal article supplement (doi:10.7717/peerj.17923), 2024-09-26
Supplement: szabolcsetal_snakeroad_supplementary1.xlsx [file szabolcsetal_snakeroad_supplementary1.xlsx]

## Sheet: Munka1
x	y	species	svl	age	sex	date	year	month	section1k	flood
21.3741	48.1874	nnatrix	594	adult	m	2012-03-25	2012	3	47	1
21.3739	48.1872	nnatrix	600	adult	f	2012-03-25	2012	3	47	1
21.3927	48.2076	nnatrix	516	adult	f	2012-04-08	2012	4	35	1
21.4126	48.229	ntessellata	373	adult	na	2012-04-08	2012	4	38	1
21.4126	48.229	nnatrix	177	young	na	2012-04-08	2012	4	38	1
21.3614	48.1711	nnatrix	407	adult	na	2012-04-08	2012	4	45	1
21.3536	48.1085	nnatrix	0	na	na	2012-04-22	2012	4	9	0
21.3684	48.1034	nnatrix	0	na	na	2012-04-22	2012	4	11	0
21.3659	48.1496	nnatrix	0	na	na	2012-04-22	2012	4	24	1
21.3597	48.1702	nnatrix	0	na	na	2012-04-22	2012	4	28	1
21.3895	48.2044	ntessellata	0	na	f	2012-04-22	2012	4	34	1
21.3899	48.2047	ntessellata	0	na	f	2012-04-22	2012	4	34	1
21.394	48.2109	nnatrix	0	na	na	2012-04-22	2012	4	35	1
21.3966	48.2149	nnatrix	538	adult	m	2012-04-22	2012	4	36	1
21.3984	48.2168	nnatrix	340	adult	na	2012-04-22	2012	4	36	1
21.3691	48.1832	nnatrix	0	na	m	2012-04-22	2012	4	46	1
21.3698	48.1842	nnatrix	0	na	f	2012-04-22	2012	4	46	1
21.3741	48.1874	ntessellata	533	adult	m	2012-04-22	2012	4	47	1
21.3502	48.1215	nnatrix	0	na	na	2012-05-06	2012	5	8	0
21.3511	48.1202	nnatrix	600	adult	na	2012-05-06	2012	5	8	0
21.3733	48.101	nnatrix	178	young	na	2012-05-06	2012	5	12	0
21.4251	48.1249	nnatrix	0	na	na	2012-05-06	2012	5	18	1
21.4053	48.1322	nnatrix	486	adult	na	2012-05-06	2012	5	19	1
21.4058	48.135	nnatrix	0	na	m	2012-05-06	2012	5	19	1
21.4058	48.1349	nnatrix	0	na	na	2012-05-06	2012	5	19	1
21.4012	48.1371	nnatrix	182	young	na	2012-05-06	2012	5	20	1
21.4009	48.1377	nnatrix	156	young	na	2012-05-06	2012	5	20	1
21.4007	48.138	nnatrix	0	na	na	2012-05-06	2012	5	20	1
21.3967	48.1415	nnatrix	177	young	na	2012-05-06	2012	5	21	1
21.3954	48.1419	nnatrix	160	young	na	2012-05-06	2012	5	21	1
21.3947	48.1423	nnatrix	0	na	na	2012-05-06	2012	5	21	1
21.3942	48.1425	nnatrix	0	na	na	2012-05-06	2012	5	21	1
21.3932	48.143	nnatrix	0	na	na	2012-05-06	2012	5	21	1
21.3914	48.1437	nnatrix	0	na	na	2012-05-06	2012	5	21	1
21.3911	48.1439	nnatrix	0	na	na	2012-05-06	2012	5	21	1
21.3899	48.1445	nnatrix	186	young	na	2012-05-06	2012	5	22	1
21.3862	48.1462	nnatrix	0	na	na	2012-05-06	2012	5	22	1
21.3855	48.1465	nnatrix	0	na	na	2012-05-06	2012	5	22	1
21.3816	48.1479	nnatrix	575	adult	na	2012-05-06	2012	5	23	1
21.378	48.1475	nnatrix	300	subadult	na	2012-05-06	2012	5	23	1
21.3778	48.1476	nnatrix	0	na	na	2012-05-06	2012	5	23	1
21.3766	48.1478	nnatrix	0	na	na	2012-05-06	2012	5	23	1
21.3765	48.1478	ntessellata	0	na	na	2012-05-06	2012	5	23	1
21.3765	48.1478	nnatrix	0	na	na	2012-05-06	2012	5	23	1
21.3765	48.1478	nnatrix	0	na	na	2012-05-06	2012	5	23	1
21.3765	48.1478	nnatrix	165	young	na	2012-05-06	2012	5	23	1
21.3765	48.1478	nnatrix	0	na	na	2012-05-06	2012	5	23	1
21.376	48.148	nnatrix	0	na	na	2012-05-06	2012	5	23	1
21.3751	48.1487	nnatrix	0	na	na	2012-05-06	2012	5	23	1
21.3758	48.1482	nnatrix	0	na	na	2012-05-06	2012	5	23	1
21.3757	48.1482	nnatrix	0	na	na	2012-05-06	2012	5	23	1
21.367	48.1493	nnatrix	0	na	na	2012-05-06	2012	5	24	1
21.3625	48.154	nnatrix	249	subadult	na	2012-05-06	2012	5	25	1
21.3625	48.1541	nnatrix	0	na	na	2012-05-06	2012	5	25	1
21.3625	48.1544	nnatrix	155	young	na	2012-05-06	2012	5	25	1
21.3658	48.1651	ntessellata	0	na	na	2012-05-06	2012	5	27	1
21.363	48.1692	nnatrix	0	na	na	2012-05-06	2012	5	27	1
21.3625	48.1694	nnatrix	300	subadult	na	2012-05-06	2012	5	27	1
21.3896	48.2043	nnatrix	370	adult	na	2012-05-06	2012	5	34	1
21.3897	48.2044	ntessellata	213	subadult	na	2012-05-06	2012	5	34	1
21.3918	48.2064	nnatrix	0	na	na	2012-05-06	2012	5	35	1
21.3942	48.2112	nnatrix	0	na	na	2012-05-06	2012	5	35	1
21.3943	48.2111	ntessellata	173	young	na	2012-05-06	2012	5	35	1
21.3942	48.2111	nnatrix	0	na	na	2012-05-06	2012	5	35	1
21.3942	48.2112	nnatrix	0	na	na	2012-05-06	2012	5	35	1
21.3941	48.2124	nnatrix	0	na	na	2012-05-06	2012	5	35	1
21.397	48.2151	nnatrix	0	na	na	2012-05-06	2012	5	36	1
21.4007	48.2189	nnatrix	360	adult	na	2012-05-06	2012	5	36	1
21.4006	48.2189	nnatrix	480	adult	na	2012-05-06	2012	5	36	1
21.4116	48.2285	ntessellata	203	subadult	na	2012-05-06	2012	5	38	1
21.4139	48.23	nnatrix	172	young	na	2012-05-06	2012	5	38	1
21.4191	48.2336	nnatrix	0	na	f	2012-05-06	2012	5	39	1
21.4141	48.0984	nnatrix	0	na	na	2012-05-06	2012	5	41	0
21.4139	48.0984	nnatrix	535	adult	na	2012-05-06	2012	5	41	0
21.3615	48.1713	ntessellata	219	subadult	na	2012-05-06	2012	5	45	1
21.3615	48.1712	nnatrix	0	na	m	2012-05-06	2012	5	45	1
21.3614	48.1711	nnatrix	0	na	m	2012-05-06	2012	5	45	1
21.3615	48.1709	nnatrix	0	na	na	2012-05-06	2012	5	45	1
21.3623	48.1736	nnatrix	369	adult	na	2012-05-06	2012	5	45	1
21.3623	48.1736	nnatrix	198	young	na	2012-05-06	2012	5	45	1
21.3681	48.1815	nnatrix	0	na	na	2012-05-06	2012	5	46	1
21.369	48.1827	nnatrix	0	na	na	2012-05-06	2012	5	46	1
21.3688	48.1826	nnatrix	0	na	na	2012-05-06	2012	5	46	1
21.3692	48.1834	ntessellata	307	adult	na	2012-05-06	2012	5	46	1
21.3692	48.1833	nnatrix	0	na	na	2012-05-06	2012	5	46	1
21.3692	48.1832	nnatrix	0	na	na	2012-05-06	2012	5	46	1
21.3744	48.1876	nnatrix	320	adult	na	2012-05-06	2012	5	47	1
21.3743	48.1876	ntessellata	181	young	na	2012-05-06	2012	5	47	1
21.3797	48.1924	nnatrix	0	na	na	2012-05-06	2012	5	48	1
21.405	48.2336	nnatrix	0	na	na	2012-05-06	2012	5	49	1
21.391	48.2072	nnatrix	495	adult	m	2012-05-06	2012	5	52	1
21.3909	48.2067	nnatrix	0	na	na	2012-05-06	2012	5	52	1
21.3909	48.2067	nnatrix	0	na	na	2012-05-06	2012	5	52	1
21.3151	48.1527	nnatrix	0	na	na	2012-05-20	2012	5	2	0
21.3186	48.1485	nnatrix	0	na	na	2012-05-20	2012	5	3	0
21.3507	48.1208	nnatrix	0	na	na	2012-05-20	2012	5	8	0
21.3512	48.1202	nnatrix	0	na	na	2012-05-20	2012	5	8	0
21.3516	48.1196	nnatrix	0	na	na	2012-05-20	2012	5	8	0
21.3529	48.1178	nnatrix	0	na	na	2012-05-20	2012	5	8	0
21.3528	48.1178	nnatrix	0	na	na	2012-05-20	2012	5	8	0
21.3529	48.1178	nnatrix	0	na	na	2012-05-20	2012	5	8	0
21.3532	48.1175	nnatrix	0	na	na	2012-05-20	2012	5	8	0
21.3538	48.1146	nnatrix	0	na	na	2012-05-20	2012	5	9	0
21.3532	48.1138	nnatrix	184	young	na	2012-05-20	2012	5	9	0
21.3524	48.1126	nnatrix	0	na	na	2012-05-20	2012	5	9	0
21.3535	48.1088	nnatrix	0	na	na	2012-05-20	2012	5	9	0
21.355	48.1062	nnatrix	0	na	na	2012-05-20	2012	5	10	0
21.3571	48.1055	nnatrix	0	na	na	2012-05-20	2012	5	10	0
21.3581	48.1054	nnatrix	0	na	na	2012-05-20	2012	5	10	0
21.3589	48.1054	nnatrix	0	na	na	2012-05-20	2012	5	10	0
21.3728	48.101	nnatrix	0	na	na	2012-05-20	2012	5	12	0
21.3752	48.1012	nnatrix	0	na	na	2012-05-20	2012	5	12	0
21.3754	48.1012	nnatrix	500	adult	na	2012-05-20	2012	5	12	0
21.3896	48.1032	nnatrix	0	na	na	2012-05-20	2012	5	14	0
21.3898	48.1034	nnatrix	0	na	na	2012-05-20	2012	5	14	0
21.3899	48.1035	nnatrix	0	na	na	2012-05-20	2012	5	14	0
21.3938	48.1052	nnatrix	0	na	na	2012-05-20	2012	5	14	0
21.4032	48.1065	nnatrix	0	na	na	2012-05-20	2012	5	15	0
21.4035	48.1066	nnatrix	0	na	na	2012-05-20	2012	5	15	0
21.4069	48.1311	nnatrix	176	young	na	2012-05-20	2012	5	19	1
21.4067	48.1315	nnatrix	0	na	na	2012-05-20	2012	5	19	1
21.4068	48.1314	nnatrix	0	na	na	2012-05-20	2012	5	19	1
21.4068	48.1314	nnatrix	196	young	na	2012-05-20	2012	5	19	1
21.4046	48.1325	nnatrix	553	adult	f	2012-05-20	2012	5	19	1
21.4047	48.1325	nnatrix	0	na	na	2012-05-20	2012	5	19	1
21.4039	48.1327	nnatrix	0	na	na	2012-05-20	2012	5	19	1
21.404	48.1327	nnatrix	0	na	na	2012-05-20	2012	5	19	1
21.4041	48.1327	nnatrix	406	adult	f	2012-05-20	2012	5	19	1
21.4045	48.1325	nnatrix	0	na	na	2012-05-20	2012	5	19	1
21.4045	48.1325	nnatrix	0	na	na	2012-05-20	2012	5	19	1
21.4023	48.1347	nnatrix	0	na	na	2012-05-20	2012	5	20	1
21.402	48.1353	nnatrix	0	na	na	2012-05-20	2012	5	20	1
21.4021	48.1351	nnatrix	0	na	na	2012-05-20	2012	5	20	1
21.4017	48.1359	nnatrix	0	na	na	2012-05-20	2012	5	20	1
21.4008	48.1377	nnatrix	0	na	na	2012-05-20	2012	5	20	1
21.4006	48.1382	nnatrix	0	na	na	2012-05-20	2012	5	20	1
21.4008	48.1378	nnatrix	0	na	na	2012-05-20	2012	5	20	1
21.4008	48.1378	nnatrix	0	na	na	2012-05-20	2012	5	20	1
21.4008	48.1378	nnatrix	0	na	na	2012-05-20	2012	5	20	1
21.3993	48.1404	nnatrix	0	na	na	2012-05-20	2012	5	20	1
21.3993	48.1403	nnatrix	0	na	na	2012-05-20	2012	5	20	1
21.3987	48.1407	nnatrix	0	na	na	2012-05-20	2012	5	20	1
21.3988	48.1407	nnatrix	527	adult	m	2012-05-20	2012	5	20	1
21.3988	48.1407	nnatrix	382	adult	m	2012-05-20	2012	5	20	1
21.3954	48.1419	nnatrix	200	young	na	2012-05-20	2012	5	21	1
21.3955	48.1419	nnatrix	0	na	na	2012-05-20	2012	5	21	1
21.3952	48.142	nnatrix	582	adult	na	2012-05-20	2012	5	21	1
21.395	48.1421	nnatrix	180	young	na	2012-05-20	2012	5	21	1
21.3945	48.1423	nnatrix	182	young	na	2012-05-20	2012	5	21	1
21.3944	48.1424	nnatrix	192	young	na	2012-05-20	2012	5	21	1
21.3942	48.1425	nnatrix	188	young	na	2012-05-20	2012	5	21	1
21.3938	48.1426	nnatrix	0	na	na	2012-05-20	2012	5	21	1
21.3937	48.1427	nnatrix	187	young	na	2012-05-20	2012	5	21	1
21.3935	48.1428	nnatrix	0	na	na	2012-05-20	2012	5	21	1
21.3935	48.1428	nnatrix	0	na	na	2012-05-20	2012	5	21	1
21.3933	48.1429	nnatrix	382	adult	na	2012-05-20	2012	5	21	1
21.3931	48.1431	nnatrix	167	young	na	2012-05-20	2012	5	21	1
21.3929	48.1431	nnatrix	465	adult	m	2012-05-20	2012	5	21	1
21.3928	48.1432	nnatrix	0	na	na	2012-05-20	2012	5	21	1
21.3913	48.1438	nnatrix	146	young	na	2012-05-20	2012	5	21	1
21.3914	48.1437	nnatrix	0	na	na	2012-05-20	2012	5	21	1
21.3901	48.1443	nnatrix	177	young	na	2012-05-20	2012	5	21	1
21.3902	48.1443	nnatrix	448	adult	f	2012-05-20	2012	5	21	1
21.3902	48.1443	nnatrix	0	na	na	2012-05-20	2012	5	21	1
21.3903	48.1442	nnatrix	0	na	na	2012-05-20	2012	5	21	1
21.3904	48.1442	nnatrix	0	na	na	2012-05-20	2012	5	21	1
21.3903	48.1443	nnatrix	0	na	na	2012-05-20	2012	5	21	1
21.3901	48.1443	nnatrix	0	na	na	2012-05-20	2012	5	22	1
21.3901	48.1444	nnatrix	0	na	na	2012-05-20	2012	5	22	1
21.3894	48.1446	nnatrix	0	na	na	2012-05-20	2012	5	22	1
21.3898	48.1444	nnatrix	179	young	na	2012-05-20	2012	5	22	1
21.3901	48.1443	nnatrix	0	na	na	2012-05-20	2012	5	22	1
21.3901	48.1444	nnatrix	183	young	na	2012-05-20	2012	5	22	1
21.3886	48.145	nnatrix	0	na	na	2012-05-20	2012	5	22	1
21.3887	48.1449	nnatrix	178	young	na	2012-05-20	2012	5	22	1
21.389	48.1447	nnatrix	610	adult	f	2012-05-20	2012	5	22	1
21.3884	48.1451	nnatrix	370	adult	f	2012-05-20	2012	5	22	1
21.3869	48.1458	nnatrix	441	adult	na	2012-05-20	2012	5	22	1
21.3868	48.1458	nnatrix	169	young	na	2012-05-20	2012	5	22	1
21.3843	48.147	nnatrix	0	na	na	2012-05-20	2012	5	22	1
21.3836	48.1473	nnatrix	410	adult	m	2012-05-20	2012	5	22	1
21.3727	48.149	nnatrix	193	young	na	2012-05-20	2012	5	24	1
21.3728	48.149	nnatrix	178	young	na	2012-05-20	2012	5	24	1
21.3727	48.149	nnatrix	0	na	na	2012-05-20	2012	5	24	1
21.3727	48.149	nnatrix	0	na	na	2012-05-20	2012	5	24	1
21.3719	48.149	nnatrix	155	young	na	2012-05-20	2012	5	24	1
21.3715	48.149	nnatrix	195	young	na	2012-05-20	2012	5	24	1
21.3707	48.1491	nnatrix	0	na	na	2012-05-20	2012	5	24	1
21.3707	48.1492	nnatrix	0	na	na	2012-05-20	2012	5	24	1
21.3706	48.1492	nnatrix	0	na	na	2012-05-20	2012	5	24	1
21.3708	48.1492	nnatrix	294	subadult	na	2012-05-20	2012	5	24	1
21.3701	48.1491	nnatrix	170	young	na	2012-05-20	2012	5	24	1
21.3669	48.1494	nnatrix	176	young	na	2012-05-20	2012	5	24	1
21.3669	48.1494	nnatrix	0	na	na	2012-05-20	2012	5	24	1
21.3634	48.152	nnatrix	0	na	na	2012-05-20	2012	5	25	1
21.3624	48.1545	nnatrix	300	subadult	na	2012-05-20	2012	5	25	1
21.3624	48.1543	nnatrix	0	na	na	2012-05-20	2012	5	25	1
21.3625	48.1541	nnatrix	0	na	na	2012-05-20	2012	5	25	1
21.3621	48.1551	nnatrix	0	na	na	2012-05-20	2012	5	25	1
21.3652	48.1682	ntessellata	330	adult	na	2012-05-20	2012	5	27	1
21.3644	48.1687	nnatrix	0	na	na	2012-05-20	2012	5	27	1
21.3623	48.1695	nnatrix	0	na	na	2012-05-20	2012	5	27	1
21.391	48.2056	nnatrix	191	young	na	2012-05-20	2012	5	35	1
21.3917	48.2063	nnatrix	172	young	na	2012-05-20	2012	5	35	1
21.3941	48.2108	nnatrix	0	na	na	2012-05-20	2012	5	35	1
21.3945	48.2116	nnatrix	298	subadult	na	2012-05-20	2012	5	35	1
21.3943	48.2111	ntessellata	0	na	na	2012-05-20	2012	5	35	1
21.3945	48.2119	nnatrix	120	young	na	2012-05-20	2012	5	35	1
21.3981	48.2164	nnatrix	485	adult	na	2012-05-20	2012	5	36	1
21.4002	48.2185	nnatrix	0	na	na	2012-05-20	2012	5	36	1
21.4013	48.2194	nnatrix	174	young	na	2012-05-20	2012	5	36	1
21.4132	48.2295	nnatrix	160	young	na	2012-05-20	2012	5	38	1
21.4169	48.1008	nnatrix	186	young	na	2012-05-20	2012	5	40	0
21.4172	48.0973	nnatrix	0	na	na	2012-05-20	2012	5	41	0
21.4172	48.0972	nnatrix	0	na	na	2012-05-20	2012	5	41	0
21.4172	48.0971	nnatrix	0	na	na	2012-05-20	2012	5	41	0
21.4172	48.097	nnatrix	0	na	na	2012-05-20	2012	5	41	0
21.4172	48.097	nnatrix	0	na	na	2012-05-20	2012	5	41	0
21.3683	48.1817	nnatrix	285	subadult	na	2012-05-20	2012	5	46	1
21.3691	48.1832	nnatrix	0	na	na	2012-05-20	2012	5	46	1
21.369	48.1829	nnatrix	164	young	na	2012-05-20	2012	5	46	1
21.4052	48.2341	nnatrix	0	na	na	2012-05-20	2012	5	49	1
21.4019	48.2293	nnatrix	0	na	na	2012-05-20	2012	5	50	1
21.3989	48.2251	nnatrix	210	subadult	na	2012-05-20	2012	5	50	1
21.3963	48.2211	nnatrix	0	na	na	2012-05-20	2012	5	51	1
21.3965	48.2215	nnatrix	0	na	na	2012-05-20	2012	5	51	1
21.3922	48.2141	nnatrix	215	subadult	na	2012-05-20	2012	5	52	1
21.3917	48.2093	nnatrix	363	adult	na	2012-05-20	2012	5	52	1
21.3916	48.2085	ntessellata	182	young	na	2012-05-20	2012	5	52	1
21.3912	48.2073	nnatrix	350	adult	na	2012-05-20	2012	5	52	1
21.3907	48.2066	nnatrix	380	adult	f	2012-05-20	2012	5	52	1
21.3901	48.2058	nnatrix	162	young	na	2012-05-20	2012	5	53	1
21.3901	48.2057	ntessellata	0	na	na	2012-05-20	2012	5	53	1
21.3903	48.206	nnatrix	166	young	na	2012-05-20	2012	5	53	1
21.39	48.2055	nnatrix	183	young	na	2012-05-20	2012	5	53	1
21.39	48.2055	nnatrix	0	na	na	2012-05-20	2012	5	53	1
21.39	48.2055	nnatrix	186	young	na	2012-05-20	2012	5	53	1
21.39	48.2056	nnatrix	173	young	na	2012-05-20	2012	5	53	1
21.3901	48.2056	nnatrix	176	young	na	2012-05-20	2012	5	53	1
21.3901	48.2056	nnatrix	0	na	na	2012-05-20	2012	5	53	1
21.3839	48.2014	nnatrix	602	adult	na	2012-05-20	2012	5	53	1
21.3838	48.2015	nnatrix	0	na	na	2012-05-20	2012	5	53	1
21.3831	48.2011	nnatrix	179	young	na	2012-05-20	2012	5	54	1
21.3804	48.1998	nnatrix	166	young	na	2012-05-20	2012	5	54	1
21.3757	48.1975	nnatrix	202	subadult	na	2012-05-20	2012	5	54	1
21.3674	48.1924	nnatrix	169	young	na	2012-05-20	2012	5	56	1
21.3675	48.1924	nnatrix	185	young	na	2012-05-20	2012	5	56	1
21.3539	48.184	nnatrix	171	young	na	2012-05-20	2012	5	57	1
21.3351	48.1425	nnatrix	250	subadult	na	2012-06-03	2012	6	5	0
21.3543	48.1069	nnatrix	0	na	na	2012-06-03	2012	6	10	0
21.3569	48.1055	nnatrix	170	young	na	2012-06-03	2012	6	10	0
21.3651	48.1043	nnatrix	0	na	f	2012-06-03	2012	6	11	0
21.3886	48.1026	nnatrix	0	na	na	2012-06-03	2012	6	14	0
21.4064	48.1316	nnatrix	185	young	na	2012-06-03	2012	6	19	1
21.4063	48.1316	nnatrix	195	young	na	2012-06-03	2012	6	19	1
21.4055	48.132	nnatrix	371	adult	m	2012-06-03	2012	6	19	1
21.4051	48.1322	nnatrix	203	subadult	na	2012-06-03	2012	6	19	1
21.4051	48.1323	nnatrix	190	young	na	2012-06-03	2012	6	19	1
21.405	48.1324	nnatrix	0	na	na	2012-06-03	2012	6	19	1
21.4048	48.1323	nnatrix	187	young	na	2012-06-03	2012	6	19	1
21.4049	48.1323	nnatrix	171	young	na	2012-06-03	2012	6	19	1
21.4044	48.1326	nnatrix	0	na	na	2012-06-03	2012	6	19	1
21.4041	48.1328	nnatrix	0	na	na	2012-06-03	2012	6	19	1
21.4026	48.1343	nnatrix	385	adult	m	2012-06-03	2012	6	20	1
21.4025	48.1344	nnatrix	0	na	na	2012-06-03	2012	6	20	1
21.4024	48.1346	nnatrix	0	na	na	2012-06-03	2012	6	20	1
21.4024	48.1345	nnatrix	169	young	na	2012-06-03	2012	6	20	1
21.4022	48.1351	nnatrix	168	young	na	2012-06-03	2012	6	20	1
21.4022	48.1352	nnatrix	398	adult	m	2012-06-03	2012	6	20	1
21.4022	48.1352	nnatrix	187	young	na	2012-06-03	2012	6	20	1
21.4019	48.1357	nnatrix	0	na	na	2012-06-03	2012	6	20	1
21.4017	48.1361	nnatrix	0	na	na	2012-06-03	2012	6	20	1
21.4017	48.1361	nnatrix	188	young	na	2012-06-03	2012	6	20	1
21.396	48.1417	nnatrix	200	young	na	2012-06-03	2012	6	21	1
21.3896	48.1446	nnatrix	0	na	na	2012-06-03	2012	6	22	1
21.3897	48.1445	nnatrix	187	young	na	2012-06-03	2012	6	22	1
21.3848	48.1468	nnatrix	186	young	na	2012-06-03	2012	6	22	1
21.3812	48.1479	nnatrix	368	adult	f	2012-06-03	2012	6	23	1
21.3766	48.1477	nnatrix	349	adult	m	2012-06-03	2012	6	23	1
21.3742	48.1487	nnatrix	177	young	na	2012-06-03	2012	6	23	1
21.3741	48.1488	nnatrix	0	na	na	2012-06-03	2012	6	23	1
21.3718	48.149	nnatrix	439	adult	m	2012-06-03	2012	6	24	1
21.3723	48.1489	nnatrix	192	young	na	2012-06-03	2012	6	24	1
21.3714	48.149	nnatrix	168	young	na	2012-06-03	2012	6	24	1
21.3686	48.149	nnatrix	210	subadult	na	2012-06-03	2012	6	24	1
21.3627	48.1536	nnatrix	196	young	na	2012-06-03	2012	6	25	1
21.3626	48.1541	nnatrix	194	young	na	2012-06-03	2012	6	25	1
21.3622	48.1551	nnatrix	186	young	na	2012-06-03	2012	6	25	1
21.3643	48.1616	ntessellata	486	adult	f	2012-06-03	2012	6	26	1
21.3641	48.1688	nnatrix	173	young	na	2012-06-03	2012	6	27	1
21.3641	48.1689	nnatrix	193	young	na	2012-06-03	2012	6	27	1
21.364	48.1688	nnatrix	175	young	na	2012-06-03	2012	6	27	1
21.3755	48.1945	nnatrix	200	young	na	2012-06-03	2012	6	32	1
21.3818	48.1991	nnatrix	331	adult	f	2012-06-03	2012	6	33	1
21.4037	48.2216	nnatrix	471	adult	m	2012-06-03	2012	6	37	1
21.4173	48.0981	nnatrix	218	subadult	na	2012-06-03	2012	6	41	0
21.4169	48.0948	nnatrix	155	young	na	2012-06-03	2012	6	41	0
21.4165	48.0873	nnatrix	162	young	na	2012-06-03	2012	6	42	0
21.4165	48.0874	nnatrix	160	young	na	2012-06-03	2012	6	42	0
21.4138	48.0838	nnatrix	164	young	na	2012-06-03	2012	6	42	0
21.4135	48.0835	nnatrix	234	subadult	na	2012-06-03	2012	6	42	0
21.4086	48.0803	nnatrix	243	subadult	na	2012-06-03	2012	6	43	0
21.4086	48.0803	nnatrix	193	young	na	2012-06-03	2012	6	43	0
21.4086	48.0803	nnatrix	205	subadult	na	2012-06-03	2012	6	43	0
21.4083	48.0775	nnatrix	178	young	na	2012-06-03	2012	6	43	0
21.3917	48.2098	nnatrix	205	subadult	na	2012-06-03	2012	6	52	1
21.3914	48.2082	nnatrix	165	young	na	2012-06-03	2012	6	52	1
21.3915	48.2085	nnatrix	0	na	na	2012-06-03	2012	6	52	1
21.3916	48.2086	nnatrix	157	young	na	2012-06-03	2012	6	52	1
21.3915	48.2087	nnatrix	204	subadult	na	2012-06-03	2012	6	52	1
21.3901	48.2057	nnatrix	182	young	na	2012-06-03	2012	6	53	1
21.3902	48.2057	nnatrix	188	young	na	2012-06-03	2012	6	53	1
21.3901	48.2058	nnatrix	183	young	na	2012-06-03	2012	6	53	1
21.3903	48.2059	nnatrix	0	na	na	2012-06-03	2012	6	53	1
21.39	48.2056	nnatrix	205	subadult	na	2012-06-03	2012	6	53	1
21.3837	48.2014	nnatrix	410	adult	f	2012-06-03	2012	6	53	1
21.3838	48.2014	nnatrix	176	young	na	2012-06-03	2012	6	53	1
21.3954	48.1055	nnatrix	370	adult	m	2012-06-17	2012	6	14	0
21.4108	48.1251	nnatrix	0	na	na	2012-06-17	2012	6	18	1
21.4057	48.132	nnatrix	460	adult	na	2012-06-17	2012	6	19	1
21.4056	48.1321	nnatrix	170	young	na	2012-06-17	2012	6	19	1
21.404	48.1327	nnatrix	168	young	na	2012-06-17	2012	6	19	1
21.4011	48.1373	nnatrix	479	adult	m	2012-06-17	2012	6	20	1
21.4014	48.1366	nnatrix	199	young	na	2012-06-17	2012	6	20	1
21.4008	48.138	nnatrix	498	adult	f	2012-06-17	2012	6	20	1
21.3989	48.1407	nnatrix	0	na	na	2012-06-17	2012	6	20	1
21.3972	48.1413	nnatrix	365	adult	f	2012-06-17	2012	6	21	1
21.3894	48.1448	nnatrix	0	na	na	2012-06-17	2012	6	22	1
21.3633	48.1522	nnatrix	0	na	na	2012-06-17	2012	6	25	1
21.3905	48.2052	nnatrix	0	na	na	2012-06-17	2012	6	34	1
21.423	48.1009	nnatrix	178	young	na	2012-06-17	2012	6	40	0
21.4168	48.0939	nnatrix	610	adult	na	2012-06-17	2012	6	41	0
21.4164	48.0874	nnatrix	430	adult	m	2012-06-17	2012	6	42	0
21.4103	48.0812	nnatrix	164	young	na	2012-06-17	2012	6	43	0
21.4103	48.0744	nnatrix	191	young	na	2012-06-17	2012	6	44	0
21.4105	48.0714	nnatrix	178	young	na	2012-06-17	2012	6	44	0
21.3646	48.1898	nnatrix	0	na	na	2012-06-17	2012	6	56	1
21.3551	48.1845	nnatrix	176	young	na	2012-06-17	2012	6	57	1
21.3556	48.106	nnatrix	0	na	na	2012-07-01	2012	7	10	0
21.4065	48.1316	nnatrix	492	adult	na	2012-07-01	2012	7	19	1
21.3989	48.1407	nnatrix	425	adult	na	2012-07-01	2012	7	20	1
21.3698	48.1491	nnatrix	0	na	na	2012-07-01	2012	7	24	1
21.3898	48.2053	nnatrix	0	na	na	2012-07-01	2012	7	53	1
21.39	48.2055	nnatrix	530	adult	m	2012-07-01	2012	7	53	1
21.4165	48.0873	nnatrix	0	na	na	2012-07-15	2012	7	42	0
21.4036	48.1329	nnatrix	0	na	na	2012-07-29	2012	7	19	1
21.4028	48.1343	nnatrix	0	na	na	2012-07-29	2012	7	20	1
21.3975	48.1412	nnatrix	0	na	na	2012-07-29	2012	7	21	1
21.3963	48.1417	nnatrix	0	na	na	2012-07-29	2012	7	21	1
21.3954	48.142	nnatrix	0	na	na	2012-07-29	2012	7	21	1
21.3793	48.1475	nnatrix	0	na	m	2012-07-29	2012	7	23	1
21.3769	48.1477	ntessellata	0	na	na	2012-07-29	2012	7	23	1
21.408	48.2254	nnatrix	0	na	na	2012-07-29	2012	7	37	1
21.3998	48.2264	nnatrix	0	na	na	2012-07-29	2012	7	50	1
21.3998	48.2264	nnatrix	0	na	m	2012-07-29	2012	7	50	1
21.4	48.2266	nnatrix	0	na	m	2012-07-29	2012	7	50	1
21.3889	48.1028	nnatrix	0	na	na	2012-08-12	2012	8	14	0
21.3918	48.1046	nnatrix	520	adult	f	2012-08-12	2012	8	14	0
21.404	48.1328	nnatrix	0	na	na	2012-08-12	2012	8	19	1
21.3866	48.146	nnatrix	0	na	na	2012-08-12	2012	8	22	1
21.3942	48.2113	ntessellata	197	young	na	2012-08-12	2012	8	35	1
21.3941	48.2109	nnatrix	152	young	na	2012-08-12	2012	8	35	1
21.3902	48.2058	ntessellata	442	adult	na	2012-08-12	2012	8	53	1
21.3438	48.1309	ntessellata	530	adult	na	2012-08-26	2012	8	6	0
21.3976	48.106	nnatrix	0	na	na	2012-08-26	2012	8	15	0
21.4056	48.132	nnatrix	0	na	na	2012-08-26	2012	8	19	1
21.4055	48.1321	nnatrix	0	na	na	2012-08-26	2012	8	19	1
21.4054	48.1322	nnatrix	350	adult	na	2012-08-26	2012	8	19	1
21.4054	48.1321	nnatrix	0	na	na	2012-08-26	2012	8	19	1
21.4034	48.1331	nnatrix	0	na	na	2012-08-26	2012	8	19	1
21.4033	48.1331	nnatrix	0	na	na	2012-08-26	2012	8	19	1
21.4033	48.1332	nnatrix	0	na	na	2012-08-26	2012	8	19	1
21.403	48.1334	nnatrix	0	na	na	2012-08-26	2012	8	19	1
21.4029	48.1337	nnatrix	0	na	na	2012-08-26	2012	8	20	1
21.4027	48.1342	nnatrix	0	na	na	2012-08-26	2012	8	20	1
21.4027	48.1342	nnatrix	0	na	na	2012-08-26	2012	8	20	1
21.4027	48.1342	nnatrix	0	na	na	2012-08-26	2012	8	20	1
21.4026	48.1343	nnatrix	0	na	na	2012-08-26	2012	8	20	1
21.391	48.2056	ntessellata	420	adult	na	2012-08-26	2012	8	35	1
21.3926	48.2074	nnatrix	465	adult	m	2012-08-26	2012	8	35	1
21.4042	48.2221	nnatrix	0	na	na	2012-08-26	2012	8	37	1
21.4167	48.2319	nnatrix	245	subadult	na	2012-08-26	2012	8	39	1
21.4096	48.0758	nnatrix	150	young	na	2012-08-26	2012	8	44	0
21.3626	48.1745	ntessellata	572	adult	f	2012-08-26	2012	8	45	1
21.4005	48.2272	nnatrix	0	na	na	2012-08-26	2012	8	50	1
21.4	48.2264	nnatrix	0	na	na	2012-08-26	2012	8	50	1
21.3998	48.2261	nnatrix	0	na	na	2012-08-26	2012	8	50	1
21.3955	48.2199	nnatrix	580	adult	na	2012-08-26	2012	8	51	1
21.3938	48.2175	nnatrix	0	na	na	2012-08-26	2012	8	51	1
21.3101	48.1585	nnatrix	0	na	na	2012-09-09	2012	9	1	0
21.4057	48.132	nnatrix	0	na	na	2012-09-09	2012	9	19	1
21.4058	48.132	nnatrix	0	na	na	2012-09-09	2012	9	19	1
21.4059	48.1319	nnatrix	0	na	na	2012-09-09	2012	9	19	1
21.4057	48.132	nnatrix	280	subadult	na	2012-09-09	2012	9	19	1
21.4035	48.133	nnatrix	0	na	na	2012-09-09	2012	9	19	1
21.4035	48.133	nnatrix	0	na	na	2012-09-09	2012	9	19	1
21.4034	48.1331	nnatrix	0	na	na	2012-09-09	2012	9	19	1
21.4033	48.1331	nnatrix	0	na	na	2012-09-09	2012	9	19	1
21.4033	48.1332	nnatrix	0	na	na	2012-09-09	2012	9	19	1
21.4027	48.134	ntessellata	0	na	na	2012-09-09	2012	9	20	1
21.4027	48.1342	nnatrix	0	na	na	2012-09-09	2012	9	20	1
21.3998	48.1398	nnatrix	0	na	na	2012-09-09	2012	9	20	1
21.3966	48.1415	nnatrix	0	na	na	2012-09-09	2012	9	21	1
21.3956	48.1419	nnatrix	0	na	na	2012-09-09	2012	9	21	1
21.3947	48.1423	nnatrix	0	na	m	2012-09-09	2012	9	21	1
21.387	48.1457	nnatrix	0	na	na	2012-09-09	2012	9	22	1
21.3777	48.1476	ntessellata	0	na	na	2012-09-09	2012	9	23	1
21.3775	48.1476	nnatrix	0	na	na	2012-09-09	2012	9	23	1
21.3766	48.1478	nnatrix	0	na	na	2012-09-09	2012	9	23	1
21.3697	48.149	nnatrix	0	na	na	2012-09-09	2012	9	24	1
21.3647	48.1686	ntessellata	0	na	na	2012-09-09	2012	9	27	1
21.3643	48.1688	nnatrix	0	na	na	2012-09-09	2012	9	27	1
21.3906	48.2052	ntessellata	193	young	na	2012-09-09	2012	9	34	1
21.3905	48.2051	nnatrix	178	young	na	2012-09-09	2012	9	34	1
21.3911	48.2057	nnatrix	360	adult	m	2012-09-09	2012	9	35	1
21.3937	48.2099	nnatrix	415	adult	m	2012-09-09	2012	9	35	1
21.3935	48.2093	nnatrix	470	adult	f	2012-09-09	2012	9	35	1
21.3943	48.2111	nnatrix	0	na	na	2012-09-09	2012	9	35	1
21.4049	48.2226	nnatrix	0	na	na	2012-09-09	2012	9	37	1
21.418	48.2328	nnatrix	0	na	na	2012-09-09	2012	9	39	1
21.3614	48.1705	ntessellata	166	young	na	2012-09-09	2012	9	45	1
21.3616	48.1719	ntessellata	0	na	na	2012-09-09	2012	9	45	1
21.3619	48.1727	ntessellata	318	adult	na	2012-09-09	2012	9	45	1
21.4085	48.238	nnatrix	0	na	na	2012-09-09	2012	9	49	1
21.4021	48.2294	nnatrix	0	na	na	2012-09-09	2012	9	50	1
21.4005	48.2272	nnatrix	0	na	m	2012-09-09	2012	9	50	1
21.3995	48.2258	ntessellata	0	na	na	2012-09-09	2012	9	50	1
21.3991	48.2252	nnatrix	0	na	na	2012-09-09	2012	9	50	1
21.398	48.2236	nnatrix	0	na	na	2012-09-09	2012	9	50	1
21.3968	48.2219	nnatrix	0	na	na	2012-09-09	2012	9	51	1
21.3958	48.2204	nnatrix	0	na	na	2012-09-09	2012	9	51	1
21.3953	48.2196	nnatrix	0	na	na	2012-09-09	2012	9	51	1
21.3921	48.2127	nnatrix	0	na	na	2012-09-09	2012	9	52	1
21.3917	48.2096	nnatrix	0	na	na	2012-09-09	2012	9	52	1
21.3877	48.2034	nnatrix	0	na	na	2012-09-09	2012	9	53	1
21.388	48.2036	nnatrix	0	na	na	2012-09-09	2012	9	53	1
21.3922	48.1047	nnatrix	510	adult	f	2012-09-23	2012	9	14	0
21.4038	48.1329	nnatrix	0	na	na	2012-09-23	2012	9	19	1
21.4035	48.1329	nnatrix	0	na	na	2012-09-23	2012	9	19	1
21.4032	48.1332	nnatrix	678	adult	na	2012-09-23	2012	9	19	1
21.4032	48.1332	nnatrix	365	adult	na	2012-09-23	2012	9	19	1
21.4032	48.1332	nnatrix	360	adult	na	2012-09-23	2012	9	19	1
21.4025	48.1347	nnatrix	0	na	na	2012-09-23	2012	9	20	1
21.3979	48.1411	nnatrix	0	na	na	2012-09-23	2012	9	21	1
21.3973	48.1412	nnatrix	499	adult	m	2012-09-23	2012	9	21	1
21.3971	48.1413	nnatrix	632	adult	f	2012-09-23	2012	9	21	1
21.3796	48.1475	ntessellata	0	na	na	2012-09-23	2012	9	23	1
21.3971	48.2154	nnatrix	397	adult	m	2012-09-23	2012	9	36	1
21.3979	48.2163	nnatrix	0	na	na	2012-09-23	2012	9	36	1
21.3978	48.216	nnatrix	475	adult	f	2012-09-23	2012	9	36	1
21.4116	48.2285	ntessellata	0	na	f	2012-09-23	2012	9	38	1
21.412	48.108	nnatrix	0	na	na	2012-09-23	2012	9	40	0
21.4092	48.0806	nnatrix	0	na	na	2012-09-23	2012	9	43	0
21.3685	48.182	ntessellata	537	adult	f	2012-09-23	2012	9	46	1
21.3945	48.2186	nnatrix	0	na	na	2012-09-23	2012	9	51	1
21.4056	48.132	nnatrix	0	na	na	2012-10-07	2012	10	19	1
21.4056	48.132	nnatrix	0	na	na	2012-10-07	2012	10	19	1
21.4056	48.132	nnatrix	0	na	na	2012-10-07	2012	10	19	1
21.4055	48.132	nnatrix	0	na	na	2012-10-07	2012	10	19	1
21.4054	48.1321	nnatrix	0	na	na	2012-10-07	2012	10	19	1
21.4048	48.1325	ntessellata	656	adult	f	2012-10-07	2012	10	19	1
21.4038	48.1329	nnatrix	356	adult	na	2012-10-07	2012	10	19	1
21.4036	48.133	nnatrix	0	na	na	2012-10-07	2012	10	19	1
21.4036	48.133	nnatrix	0	na	na	2012-10-07	2012	10	19	1
21.4035	48.133	nnatrix	0	na	na	2012-10-07	2012	10	19	1
21.4035	48.1329	nnatrix	0	na	na	2012-10-07	2012	10	19	1
21.4035	48.1329	nnatrix	307	adult	na	2012-10-07	2012	10	19	1
21.4034	48.133	nnatrix	0	na	na	2012-10-07	2012	10	19	1
21.4033	48.1331	nnatrix	0	na	na	2012-10-07	2012	10	19	1
21.4031	48.1333	nnatrix	475	adult	na	2012-10-07	2012	10	19	1
21.4031	48.1334	nnatrix	0	na	na	2012-10-07	2012	10	19	1
21.4031	48.1334	nnatrix	0	na	na	2012-10-07	2012	10	19	1
21.403	48.1335	nnatrix	0	na	na	2012-10-07	2012	10	20	1
21.4028	48.1339	nnatrix	0	na	na	2012-10-07	2012	10	20	1
21.4026	48.1341	nnatrix	305	adult	na	2012-10-07	2012	10	20	1
21.4024	48.1347	nnatrix	340	adult	na	2012-10-07	2012	10	20	1
21.4024	48.1349	nnatrix	0	na	na	2012-10-07	2012	10	20	1
21.3994	48.1404	nnatrix	284	subadult	na	2012-10-07	2012	10	20	1
21.3968	48.1414	nnatrix	0	na	na	2012-10-07	2012	10	21	1
21.3966	48.1415	nnatrix	0	na	na	2012-10-07	2012	10	21	1
21.3962	48.1416	nnatrix	0	na	na	2012-10-07	2012	10	21	1
21.3889	48.1352	nnatrix	0	na	na	2012-10-07	2012	10	21	1
21.3903	48.1443	nnatrix	0	na	na	2012-10-07	2012	10	21	1
21.3751	48.1484	nnatrix	0	na	na	2012-10-07	2012	10	23	1
21.3751	48.1484	nnatrix	0	na	na	2012-10-07	2012	10	23	1
21.3748	48.1485	nnatrix	0	na	na	2012-10-07	2012	10	23	1
21.3712	48.1491	nnatrix	0	na	na	2012-10-07	2012	10	24	1
21.3659	48.1495	nnatrix	0	na	na	2012-10-07	2012	10	24	1
21.3649	48.1498	nnatrix	0	na	na	2012-10-07	2012	10	24	1
21.374	48.1936	nnatrix	381	adult	na	2012-10-07	2012	10	32	1
21.3905	48.2052	nnatrix	343	adult	na	2012-10-07	2012	10	34	1
21.3944	48.2117	nnatrix	392	adult	na	2012-10-07	2012	10	35	1
21.3941	48.211	nnatrix	620	adult	f	2012-10-07	2012	10	35	1
21.3964	48.2146	ntessellata	164	young	na	2012-10-07	2012	10	36	1
21.3968	48.215	ntessellata	305	adult	na	2012-10-07	2012	10	36	1
21.4012	48.2194	ntessellata	400	adult	m	2012-10-07	2012	10	36	1
21.4062	48.2238	ntessellata	585	adult	f	2012-10-07	2012	10	37	1
21.4056	48.2233	ntessellata	204	subadult	na	2012-10-07	2012	10	37	1
21.4067	48.2242	nnatrix	477	adult	f	2012-10-07	2012	10	37	1
21.4087	48.226	nnatrix	292	subadult	m	2012-10-07	2012	10	38	1
21.4088	48.2261	ntessellata	501	adult	f	2012-10-07	2012	10	38	1
21.417	48.0987	nnatrix	720	adult	f	2012-10-07	2012	10	41	0
21.3621	48.173	nnatrix	464	adult	m	2012-10-07	2012	10	45	1
21.3676	48.1805	nnatrix	515	adult	f	2012-10-07	2012	10	46	1
21.3683	48.1819	nnatrix	497	adult	m	2012-10-07	2012	10	46	1
21.3689	48.1826	nnatrix	624	adult	f	2012-10-07	2012	10	46	1
21.3695	48.1838	ntessellata	283	subadult	na	2012-10-07	2012	10	46	1
21.3737	48.1871	ntessellata	475	adult	m	2012-10-07	2012	10	47	1
21.3767	48.19	nnatrix	617	adult	f	2012-10-07	2012	10	47	1
21.3493	48.1228	nnatrix	415	adult	na	2012-10-21	2012	10	8	0
21.3505	48.1209	nnatrix	0	na	na	2012-10-21	2012	10	8	0
21.3506	48.1208	nnatrix	540	adult	na	2012-10-21	2012	10	8	0
21.3526	48.1181	nnatrix	0	na	na	2012-10-21	2012	10	8	0
21.3775	48.1013	nnatrix	0	na	na	2012-10-21	2012	10	12	0
21.3862	48.102	nnatrix	0	na	na	2012-10-21	2012	10	13	0
21.3887	48.1026	nnatrix	466	adult	f	2012-10-21	2012	10	14	0
21.3894	48.103	nnatrix	0	na	na	2012-10-21	2012	10	14	0
21.3894	48.1031	nnatrix	460	adult	na	2012-10-21	2012	10	14	0
21.3896	48.1032	nnatrix	0	na	na	2012-10-21	2012	10	14	0
21.3921	48.1047	nnatrix	0	na	na	2012-10-21	2012	10	14	0
21.3927	48.1048	nnatrix	0	na	na	2012-10-21	2012	10	14	0
21.3979	48.1061	nnatrix	0	na	na	2012-10-21	2012	10	15	0
21.3981	48.1061	nnatrix	0	na	na	2012-10-21	2012	10	15	0
21.4115	48.1259	nnatrix	0	na	na	2012-10-21	2012	10	18	1
21.4113	48.1264	nnatrix	0	na	na	2012-10-21	2012	10	18	1
21.4058	48.132	nnatrix	0	na	na	2012-10-21	2012	10	19	1
21.4051	48.1323	nnatrix	0	na	na	2012-10-21	2012	10	19	1
21.4035	48.133	nnatrix	0	na	na	2012-10-21	2012	10	19	1
21.4034	48.1331	nnatrix	465	adult	na	2012-10-21	2012	10	19	1
21.4034	48.133	ntessellata	363	adult	na	2012-10-21	2012	10	19	1
21.4033	48.1331	nnatrix	203	subadult	na	2012-10-21	2012	10	19	1
21.4032	48.1332	nnatrix	0	na	na	2012-10-21	2012	10	19	1
21.4032	48.1333	nnatrix	357	adult	na	2012-10-21	2012	10	19	1
21.4031	48.1333	nnatrix	0	na	na	2012-10-21	2012	10	19	1
21.4031	48.1333	nnatrix	280	subadult	na	2012-10-21	2012	10	19	1
21.4031	48.1333	nnatrix	0	na	na	2012-10-21	2012	10	19	1
21.403	48.1335	nnatrix	326	adult	na	2012-10-21	2012	10	20	1
21.403	48.1336	nnatrix	0	na	na	2012-10-21	2012	10	20	1
21.4027	48.134	nnatrix	0	na	na	2012-10-21	2012	10	20	1
21.4027	48.1342	nnatrix	0	na	na	2012-10-21	2012	10	20	1
21.3997	48.1399	nnatrix	0	na	na	2012-10-21	2012	10	20	1
21.3969	48.1414	nnatrix	0	na	na	2012-10-21	2012	10	21	1
21.3968	48.1415	nnatrix	0	na	na	2012-10-21	2012	10	21	1
21.3967	48.1415	nnatrix	255	subadult	na	2012-10-21	2012	10	21	1
21.3967	48.1415	nnatrix	0	na	na	2012-10-21	2012	10	21	1
21.3966	48.1415	nnatrix	506	adult	f	2012-10-21	2012	10	21	1
21.3965	48.1416	nnatrix	0	na	na	2012-10-21	2012	10	21	1
21.3965	48.1415	nnatrix	423	adult	na	2012-10-21	2012	10	21	1
21.3963	48.1417	nnatrix	0	na	na	2012-10-21	2012	10	21	1
21.3956	48.1419	nnatrix	263	subadult	na	2012-10-21	2012	10	21	1
21.3952	48.1421	nnatrix	301	adult	na	2012-10-21	2012	10	21	1
21.3946	48.1423	nnatrix	0	na	na	2012-10-21	2012	10	21	1
21.3802	48.1476	nnatrix	0	na	na	2012-10-21	2012	10	23	1
21.3789	48.1474	nnatrix	0	na	na	2012-10-21	2012	10	23	1
21.3778	48.1476	nnatrix	0	na	na	2012-10-21	2012	10	23	1
21.3771	48.1477	nnatrix	0	na	na	2012-10-21	2012	10	23	1
21.3766	48.1478	nnatrix	241	subadult	na	2012-10-21	2012	10	23	1
21.3762	48.148	nnatrix	0	na	na	2012-10-21	2012	10	23	1
21.3761	48.148	nnatrix	0	na	na	2012-10-21	2012	10	23	1
21.376	48.148	nnatrix	270	subadult	na	2012-10-21	2012	10	23	1
21.3755	48.1483	nnatrix	535	adult	m	2012-10-21	2012	10	23	1
21.3749	48.1486	nnatrix	0	na	na	2012-10-21	2012	10	23	1
21.3748	48.1486	nnatrix	0	na	na	2012-10-21	2012	10	23	1
21.3741	48.1488	nnatrix	421	adult	m	2012-10-21	2012	10	23	1
21.3714	48.1491	nnatrix	0	na	na	2012-10-21	2012	10	24	1
21.3714	48.149	nnatrix	0	na	na	2012-10-21	2012	10	24	1
21.3664	48.1495	nnatrix	0	na	na	2012-10-21	2012	10	24	1
21.3897	48.2044	nnatrix	287	subadult	na	2012-10-21	2012	10	34	1
21.3941	48.2107	nnatrix	590	adult	na	2012-10-21	2012	10	35	1
21.3939	48.2104	nnatrix	0	na	na	2012-10-21	2012	10	35	1
21.4044	48.2223	nnatrix	543	adult	na	2012-10-21	2012	10	37	1
21.4043	48.2327	nnatrix	303	adult	na	2012-10-21	2012	10	49	1
21.4041	48.2323	nnatrix	0	na	na	2012-10-21	2012	10	49	1
21.3957	48.2203	nnatrix	0	na	na	2012-10-21	2012	10	51	1
21.3927	48.2159	nnatrix	0	na	na	2012-10-21	2012	10	51	1
21.3928	48.216	nnatrix	405	adult	m	2012-10-21	2012	10	51	1
21.3926	48.2155	nnatrix	545	adult	na	2012-10-21	2012	10	51	1
21.3918	48.2103	nnatrix	0	na	na	2012-10-21	2012	10	52	1
21.3794	48.1993	nnatrix	0	na	m	2012-10-21	2012	10	54	1
21.379	48.199	nnatrix	0	na	na	2012-10-21	2012	10	54	1
21.3718	48.1954	nnatrix	0	na	na	2012-10-21	2012	10	55	1
21.3489	48.179	nnatrix	425	adult	na	2012-10-21	2012	10	58	1
21.3855	48.1464	nnatrix	210	subadult	na	2013-04-21	2013	4	22	1
21.3788	48.1971	ntessellata	205	subadult	na	2013-04-21	2013	4	33	1
21.3869	48.2024	nnatrix	310	adult	na	2013-04-21	2013	4	34	1
21.4035	48.2215	ntessellata	516	adult	f	2013-04-21	2013	4	37	1
21.4089	48.0804	nnatrix	264	subadult	na	2013-04-21	2013	4	43	0
21.3616	48.1718	ntessellata	398	adult	m	2013-04-21	2013	4	45	1
21.3667	48.1793	nnatrix	0	na	na	2013-04-21	2013	4	46	1
21.3682	48.1816	nnatrix	0	na	f	2013-04-21	2013	4	46	1
21.3682	48.1815	nnatrix	404	adult	m	2013-04-21	2013	4	46	1
21.3687	48.1823	nnatrix	404	adult	m	2013-04-21	2013	4	46	1
21.3751	48.188	nnatrix	518	adult	m	2013-04-21	2013	4	47	1
21.3782	48.1914	ntessellata	494	adult	na	2013-04-21	2013	4	48	1
21.4062	48.1318	nnatrix	0	na	na	2013-05-05	2013	5	19	1
21.4025	48.1344	nnatrix	0	na	na	2013-05-05	2013	5	20	1
21.3988	48.1407	nnatrix	0	na	na	2013-05-05	2013	5	20	1
21.3954	48.1419	nnatrix	0	na	na	2013-05-05	2013	5	21	1
21.3952	48.1421	nnatrix	0	na	na	2013-05-05	2013	5	21	1
21.395	48.1422	nnatrix	0	na	na	2013-05-05	2013	5	21	1
21.3935	48.1428	nnatrix	0	na	na	2013-05-05	2013	5	21	1
21.3933	48.1429	nnatrix	0	na	na	2013-05-05	2013	5	21	1
21.3932	48.1429	nnatrix	0	na	na	2013-05-05	2013	5	21	1
21.3913	48.1438	nnatrix	0	na	na	2013-05-05	2013	5	21	1
21.3912	48.1438	nnatrix	0	na	na	2013-05-05	2013	5	21	1
21.3896	48.1446	nnatrix	0	na	na	2013-05-05	2013	5	22	1
21.3893	48.1447	nnatrix	0	na	na	2013-05-05	2013	5	22	1
21.3893	48.1447	nnatrix	0	na	na	2013-05-05	2013	5	22	1
21.3873	48.1457	nnatrix	0	na	na	2013-05-05	2013	5	22	1
21.3875	48.1455	nnatrix	0	na	na	2013-05-05	2013	5	22	1
21.3864	48.146	nnatrix	0	na	na	2013-05-05	2013	5	22	1
21.3854	48.1465	nnatrix	0	na	na	2013-05-05	2013	5	22	1
21.3855	48.1464	nnatrix	0	na	na	2013-05-05	2013	5	22	1
21.3776	48.1475	nnatrix	0	na	na	2013-05-05	2013	5	23	1
21.3765	48.1478	nnatrix	0	na	na	2013-05-05	2013	5	23	1
21.3758	48.148	ntessellata	0	na	na	2013-05-05	2013	5	23	1
21.3659	48.1496	nnatrix	0	na	na	2013-05-05	2013	5	24	1
21.3624	48.1546	nnatrix	0	na	na	2013-05-05	2013	5	25	1
21.3623	48.1547	nnatrix	0	na	na	2013-05-05	2013	5	25	1
21.3624	48.1546	nnatrix	0	na	na	2013-05-05	2013	5	25	1
21.3607	48.1578	nnatrix	0	na	na	2013-05-05	2013	5	25	1
21.3632	48.1691	nnatrix	0	na	na	2013-05-05	2013	5	27	1
21.3491	48.1742	nnatrix	0	na	na	2013-05-05	2013	5	29	1
21.3808	48.1985	nnatrix	0	na	na	2013-05-05	2013	5	33	1
21.3933	48.2092	nnatrix	0	na	na	2013-05-05	2013	5	35	1
21.3938	48.2103	nnatrix	0	na	na	2013-05-05	2013	5	35	1
21.3939	48.2105	ntessellata	0	na	na	2013-05-05	2013	5	35	1
21.3939	48.2104	ntessellata	0	na	na	2013-05-05	2013	5	35	1
21.3943	48.2114	nnatrix	0	na	na	2013-05-05	2013	5	35	1
21.3942	48.2113	nnatrix	0	na	na	2013-05-05	2013	5	35	1
21.3943	48.2111	nnatrix	0	na	na	2013-05-05	2013	5	35	1
21.3941	48.2109	nnatrix	0	na	na	2013-05-05	2013	5	35	1
21.4018	48.2199	nnatrix	0	na	na	2013-05-05	2013	5	37	1
21.4045	48.2223	nnatrix	0	na	na	2013-05-05	2013	5	37	1
21.4052	48.2229	nnatrix	0	na	na	2013-05-05	2013	5	37	1
21.4051	48.2228	nnatrix	0	na	na	2013-05-05	2013	5	37	1
21.4121	48.2286	nnatrix	0	na	na	2013-05-05	2013	5	38	1
21.412	48.2286	ntessellata	0	na	na	2013-05-05	2013	5	38	1
21.412	48.2286	nnatrix	0	na	na	2013-05-05	2013	5	38	1
21.4119	48.2286	nnatrix	0	na	na	2013-05-05	2013	5	38	1
21.413	48.2294	nnatrix	0	na	na	2013-05-05	2013	5	38	1
21.4132	48.2295	nnatrix	0	na	na	2013-05-05	2013	5	38	1
21.4139	48.23	nnatrix	0	na	na	2013-05-05	2013	5	38	1
21.4142	48.2302	nnatrix	0	na	na	2013-05-05	2013	5	38	1
21.4154	48.2309	ntessellata	0	na	na	2013-05-05	2013	5	38	1
21.4153	48.231	nnatrix	0	na	na	2013-05-05	2013	5	38	1
21.4155	48.2311	ntessellata	0	na	na	2013-05-05	2013	5	39	1
21.4175	48.2325	nnatrix	0	na	na	2013-05-05	2013	5	39	1
21.3615	48.171	nnatrix	0	na	na	2013-05-05	2013	5	45	1
21.3623	48.1735	nnatrix	0	na	na	2013-05-05	2013	5	45	1
21.3668	48.1797	nnatrix	0	na	na	2013-05-05	2013	5	46	1
21.3668	48.1796	nnatrix	0	na	na	2013-05-05	2013	5	46	1
21.3676	48.1805	nnatrix	500	adult	m	2013-05-05	2013	5	46	1
21.367	48.1801	ntessellata	202	subadult	na	2013-05-05	2013	5	46	1
21.3721	48.1859	nnatrix	0	na	na	2013-05-05	2013	5	47	1
21.3719	48.1858	nnatrix	0	na	na	2013-05-05	2013	5	47	1
21.3997	48.2259	nnatrix	0	na	na	2013-05-05	2013	5	50	1
21.3871	48.203	nnatrix	0	na	na	2013-05-05	2013	5	53	1
21.3789	48.199	nnatrix	0	na	na	2013-05-05	2013	5	54	1
21.3612	48.1872	nnatrix	0	na	na	2013-05-05	2013	5	56	1
21.318	48.1494	nnatrix	0	na	na	2013-05-19	2013	5	3	0
21.3192	48.1479	nnatrix	0	na	na	2013-05-19	2013	5	3	0
21.3191	48.1481	nnatrix	0	na	na	2013-05-19	2013	5	3	0
21.3208	48.1467	nnatrix	0	na	na	2013-05-19	2013	5	3	0
21.3215	48.1463	nnatrix	0	na	na	2013-05-19	2013	5	3	0
21.3214	48.1463	nnatrix	0	na	na	2013-05-19	2013	5	3	0
21.3217	48.1462	nnatrix	0	na	na	2013-05-19	2013	5	3	0
21.3254	48.1448	nnatrix	0	na	na	2013-05-19	2013	5	4	0
21.3344	48.1426	nnatrix	0	na	na	2013-05-19	2013	5	5	0
21.3507	48.1209	nnatrix	0	na	na	2013-05-19	2013	5	8	0
21.3513	48.12	nnatrix	0	na	na	2013-05-19	2013	5	8	0
21.3512	48.1202	nnatrix	0	na	na	2013-05-19	2013	5	8	0
21.3532	48.1175	nnatrix	0	na	na	2013-05-19	2013	5	8	0
21.3531	48.1175	nnatrix	0	na	na	2013-05-19	2013	5	8	0
21.3524	48.1123	nnatrix	0	na	na	2013-05-19	2013	5	9	0
21.3524	48.1114	nnatrix	0	na	na	2013-05-19	2013	5	9	0
21.3524	48.1122	nnatrix	0	na	na	2013-05-19	2013	5	9	0
21.3522	48.1118	nnatrix	0	na	na	2013-05-19	2013	5	9	0
21.3524	48.1112	nnatrix	0	na	na	2013-05-19	2013	5	9	0
21.3532	48.1092	nnatrix	0	na	na	2013-05-19	2013	5	9	0
21.3532	48.1093	nnatrix	0	na	na	2013-05-19	2013	5	9	0
21.3534	48.1087	nnatrix	0	na	na	2013-05-19	2013	5	9	0
21.3533	48.1088	nnatrix	0	na	na	2013-05-19	2013	5	9	0
21.3539	48.1077	nnatrix	0	na	na	2013-05-19	2013	5	10	0
21.3547	48.1065	nnatrix	0	na	na	2013-05-19	2013	5	10	0
21.3584	48.1053	nnatrix	0	na	na	2013-05-19	2013	5	10	0
21.3593	48.1054	nnatrix	0	na	na	2013-05-19	2013	5	10	0
21.3754	48.1012	nnatrix	0	na	na	2013-05-19	2013	5	12	0
21.3842	48.1012	nnatrix	0	na	na	2013-05-19	2013	5	13	0
21.3918	48.1046	nnatrix	0	na	na	2013-05-19	2013	5	14	0
21.3987	48.1062	nnatrix	0	na	na	2013-05-19	2013	5	15	0
21.4062	48.1317	nnatrix	0	na	na	2013-05-19	2013	5	19	1
21.4052	48.1322	nnatrix	0	na	na	2013-05-19	2013	5	19	1
21.3972	48.1413	nnatrix	0	na	na	2013-05-19	2013	5	21	1
21.3962	48.1416	nnatrix	0	na	na	2013-05-19	2013	5	21	1
21.3934	48.1428	nnatrix	0	na	na	2013-05-19	2013	5	21	1
21.3902	48.1443	nnatrix	0	na	na	2013-05-19	2013	5	21	1
21.3898	48.1445	nnatrix	0	na	na	2013-05-19	2013	5	22	1
21.3886	48.145	nnatrix	0	na	na	2013-05-19	2013	5	22	1
21.3827	48.1477	nnatrix	0	na	na	2013-05-19	2013	5	22	1
21.3635	48.1518	nnatrix	0	na	na	2013-05-19	2013	5	25	1
21.3621	48.1551	nnatrix	0	na	na	2013-05-19	2013	5	25	1
21.3673	48.1885	ntessellata	0	na	na	2013-05-19	2013	5	31	1
21.3713	48.192	nnatrix	0	na	na	2013-05-19	2013	5	32	1
21.3741	48.1937	nnatrix	190	young	na	2013-05-19	2013	5	32	1
21.3918	48.2064	nnatrix	0	na	na	2013-05-19	2013	5	35	1
21.3956	48.2133	nnatrix	0	na	na	2013-05-19	2013	5	36	1
21.4172	48.0977	nnatrix	0	na	na	2013-05-19	2013	5	41	0
21.4167	48.0918	nnatrix	0	na	na	2013-05-19	2013	5	41	0
21.4106	48.0732	nnatrix	0	na	na	2013-05-19	2013	5	44	0
21.369	48.1827	ntessellata	0	na	na	2013-05-19	2013	5	46	1
21.4064	48.2355	nnatrix	0	na	na	2013-05-19	2013	5	49	1
21.3943	48.2183	nnatrix	0	na	na	2013-05-19	2013	5	51	1
21.3612	48.1872	nnatrix	0	na	na	2013-05-19	2013	5	56	1
21.3182	48.1491	nnatrix	0	na	na	2013-06-02	2013	6	3	0
21.318	48.1493	nnatrix	0	na	na	2013-06-02	2013	6	3	0
21.318	48.1494	nnatrix	0	na	na	2013-06-02	2013	6	3	0
21.3179	48.1495	nnatrix	0	na	na	2013-06-02	2013	6	3	0
21.3444	48.1302	nnatrix	0	na	na	2013-06-02	2013	6	7	0
21.3525	48.1103	nnatrix	0	na	na	2013-06-02	2013	6	9	0
21.3734	48.101	nnatrix	0	na	na	2013-06-02	2013	6	12	0
21.3742	48.1011	nnatrix	0	na	na	2013-06-02	2013	6	12	0
21.3754	48.1012	nnatrix	0	na	na	2013-06-02	2013	6	12	0
21.3901	48.1035	nnatrix	0	na	na	2013-06-02	2013	6	14	0
21.4112	48.1118	nnatrix	0	na	na	2013-06-02	2013	6	16	0
21.4055	48.1321	nnatrix	0	na	na	2013-06-02	2013	6	19	1
21.402	48.1352	nnatrix	0	na	na	2013-06-02	2013	6	20	1
21.3985	48.1408	nnatrix	0	na	na	2013-06-02	2013	6	20	1
21.3886	48.145	nnatrix	0	na	na	2013-06-02	2013	6	22	1
21.3885	48.145	nnatrix	0	na	na	2013-06-02	2013	6	22	1
21.3829	48.1477	nnatrix	0	na	na	2013-06-02	2013	6	22	1
21.3819	48.1479	nnatrix	0	na	na	2013-06-02	2013	6	23	1
21.3706	48.1491	nnatrix	0	na	na	2013-06-02	2013	6	24	1
21.3707	48.1491	nnatrix	0	na	na	2013-06-02	2013	6	24	1
21.3707	48.1491	nnatrix	0	na	na	2013-06-02	2013	6	24	1
21.3708	48.1491	nnatrix	0	na	na	2013-06-02	2013	6	24	1
21.3709	48.1491	nnatrix	0	na	na	2013-06-02	2013	6	24	1
21.3637	48.1515	nnatrix	0	na	na	2013-06-02	2013	6	25	1
21.3636	48.1517	nnatrix	0	na	na	2013-06-02	2013	6	25	1
21.3939	48.2107	nnatrix	0	na	na	2013-06-02	2013	6	35	1
21.4065	48.2241	nnatrix	0	na	na	2013-06-02	2013	6	37	1
21.4084	48.0801	nnatrix	0	na	na	2013-06-02	2013	6	43	0
21.401	48.2279	nnatrix	0	na	na	2013-06-02	2013	6	50	1
21.3903	48.2057	nnatrix	0	na	na	2013-06-02	2013	6	53	1
21.3839	48.2015	nnatrix	0	na	na	2013-06-02	2013	6	53	1
21.3839	48.2015	nnatrix	0	na	na	2013-06-02	2013	6	53	1
21.3609	48.1871	nnatrix	0	na	na	2013-06-02	2013	6	56	1
21.3183	48.149	nnatrix	0	na	na	2013-06-16	2013	6	3	0
21.3195	48.1476	nnatrix	0	na	na	2013-06-16	2013	6	3	0
21.3526	48.1182	nnatrix	0	na	na	2013-06-16	2013	6	8	0
21.3523	48.1124	nnatrix	0	na	na	2013-06-16	2013	6	9	0
21.3733	48.101	nnatrix	0	na	na	2013-06-16	2013	6	12	0
21.3906	48.1039	nnatrix	0	na	na	2013-06-16	2013	6	14	0
21.3978	48.1411	nnatrix	0	na	na	2013-06-16	2013	6	21	1
21.3951	48.142	nnatrix	0	na	na	2013-06-16	2013	6	21	1
21.3868	48.1458	nnatrix	0	na	na	2013-06-16	2013	6	22	1
21.3819	48.148	nnatrix	0	na	na	2013-06-16	2013	6	23	1
21.365	48.1685	nnatrix	0	na	na	2013-06-16	2013	6	27	1
21.3907	48.2054	nnatrix	0	na	na	2013-06-16	2013	6	34	1
21.3942	48.2113	nnatrix	0	na	na	2013-06-16	2013	6	35	1
21.3962	48.2212	nnatrix	0	na	na	2013-06-16	2013	6	51	1
21.3957	48.2203	nnatrix	0	na	m	2013-06-16	2013	6	51	1
21.3745	48.1968	nnatrix	0	na	na	2013-06-16	2013	6	55	1
21.3896	48.2044	ntessellata	0	na	f	2013-06-30	2013	6	34	1
21.3656	48.1782	ntessellata	0	na	f	2013-06-30	2013	6	46	1
21.4004	48.2271	nnatrix	0	na	na	2013-06-30	2013	6	50	1
21.3382	48.1385	nnatrix	0	na	na	2013-08-11	2013	8	5	0
21.365	48.1043	nnatrix	0	na	na	2013-08-11	2013	8	11	0
21.3657	48.1041	nnatrix	0	na	na	2013-08-11	2013	8	11	0
21.3812	48.1005	nnatrix	0	na	na	2013-08-11	2013	8	13	0
21.3966	48.1059	nnatrix	0	na	na	2013-08-11	2013	8	15	0
21.3763	48.1479	nnatrix	0	na	na	2013-08-11	2013	8	23	1
21.4105	48.0716	nnatrix	0	na	na	2013-08-11	2013	8	44	0
21.3798	48.1926	ntessellata	0	na	na	2013-08-11	2013	8	49	1
21.4041	48.2323	nnatrix	0	na	na	2013-08-11	2013	8	49	1
21.3505	48.1812	nnatrix	0	na	na	2013-08-11	2013	8	58	1
21.3332	48.1429	nnatrix	0	na	na	2013-09-08	2013	9	5	0
21.3497	48.1222	nnatrix	0	na	na	2013-09-08	2013	9	8	0
21.3501	48.1216	nnatrix	0	na	na	2013-09-08	2013	9	8	0
21.3506	48.121	nnatrix	0	na	na	2013-09-08	2013	9	8	0
21.3507	48.1208	nnatrix	0	na	na	2013-09-08	2013	9	8	0
21.3511	48.1202	nnatrix	0	na	na	2013-09-08	2013	9	8	0
21.3517	48.1194	nnatrix	0	na	na	2013-09-08	2013	9	8	0
21.3524	48.1185	nnatrix	0	na	na	2013-09-08	2013	9	8	0
21.3528	48.1179	nnatrix	0	na	na	2013-09-08	2013	9	8	0
21.3535	48.1167	nnatrix	0	na	na	2013-09-08	2013	9	8	0
21.3536	48.1166	nnatrix	0	na	na	2013-09-08	2013	9	8	0
21.3537	48.1165	nnatrix	0	na	na	2013-09-08	2013	9	8	0
21.3539	48.1163	nnatrix	0	na	na	2013-09-08	2013	9	8	0
21.3541	48.116	nnatrix	0	na	na	2013-09-08	2013	9	9	0
21.3542	48.1158	nnatrix	0	na	na	2013-09-08	2013	9	9	0
21.3539	48.1148	nnatrix	0	na	na	2013-09-08	2013	9	9	0
21.353	48.1094	nnatrix	167	young	na	2013-09-08	2013	9	9	0
21.3922	48.1047	nnatrix	0	na	na	2013-09-08	2013	9	14	0
21.4031	48.1333	nnatrix	0	na	na	2013-09-08	2013	9	19	1
21.4029	48.1336	nnatrix	0	na	na	2013-09-08	2013	9	20	1
21.403	48.1336	nnatrix	0	na	na	2013-09-08	2013	9	20	1
21.395	48.1421	nnatrix	0	na	na	2013-09-08	2013	9	21	1
21.3772	48.1477	ntessellata	0	na	na	2013-09-08	2013	9	23	1
21.3762	48.1479	ntessellata	0	na	na	2013-09-08	2013	9	23	1
21.3632	48.1534	ntessellata	0	na	na	2013-09-08	2013	9	25	1
21.4096	48.0757	nnatrix	0	na	na	2013-09-08	2013	9	44	0
21.363	48.1759	nnatrix	0	na	na	2013-09-08	2013	9	45	1
21.3683	48.1818	ntessellata	0	na	na	2013-09-08	2013	9	46	1
21.369	48.1827	nnatrix	0	na	na	2013-09-08	2013	9	46	1
21.3687	48.1823	ntessellata	0	na	na	2013-09-08	2013	9	46	1
21.3741	48.1874	nnatrix	0	na	na	2013-09-08	2013	9	47	1
21.3763	48.187	nnatrix	0	na	na	2013-09-08	2013	9	47	1
21.3757	48.1886	nnatrix	0	na	na	2013-09-08	2013	9	47	1
21.4005	48.2272	nnatrix	0	na	na	2013-09-08	2013	9	50	1
21.3991	48.2251	nnatrix	0	na	na	2013-09-08	2013	9	50	1
21.3977	48.2232	nnatrix	0	na	na	2013-09-08	2013	9	50	1
21.3348	48.1424	nnatrix	0	na	na	2013-09-22	2013	9	5	0
21.3512	48.12	nnatrix	0	na	na	2013-09-22	2013	9	8	0
21.3511	48.1202	nnatrix	0	na	na	2013-09-22	2013	9	8	0
21.3511	48.1203	nnatrix	0	na	na	2013-09-22	2013	9	8	0
21.3515	48.1196	nnatrix	0	na	na	2013-09-22	2013	9	8	0
21.3534	48.117	nnatrix	0	na	na	2013-09-22	2013	9	8	0
21.3542	48.1157	nnatrix	0	na	na	2013-09-22	2013	9	9	0
21.3523	48.1119	nnatrix	0	na	na	2013-09-22	2013	9	9	0
21.384	48.1011	nnatrix	0	na	na	2013-09-22	2013	9	13	0
21.3879	48.1024	nnatrix	0	na	na	2013-09-22	2013	9	14	0
21.3916	48.1045	nnatrix	0	na	na	2013-09-22	2013	9	14	0
21.4116	48.1255	nnatrix	0	na	na	2013-09-22	2013	9	18	1
21.4064	48.1317	nnatrix	0	na	na	2013-09-22	2013	9	19	1
21.4034	48.1331	nnatrix	0	na	na	2013-09-22	2013	9	19	1
21.4033	48.1331	ntessellata	0	na	na	2013-09-22	2013	9	19	1
21.4033	48.1332	nnatrix	0	na	na	2013-09-22	2013	9	19	1
21.4029	48.1338	ntessellata	0	na	na	2013-09-22	2013	9	20	1
21.4028	48.1339	nnatrix	0	na	na	2013-09-22	2013	9	20	1
21.3997	48.1398	nnatrix	0	na	na	2013-09-22	2013	9	20	1
21.3945	48.1424	nnatrix	0	na	na	2013-09-22	2013	9	21	1
21.379	48.1474	ntessellata	0	na	m	2013-09-22	2013	9	23	1
21.3787	48.1474	nnatrix	0	na	na	2013-09-22	2013	9	23	1
21.3788	48.1474	ntessellata	0	na	na	2013-09-22	2013	9	23	1
21.379	48.1474	nnatrix	0	na	na	2013-09-22	2013	9	23	1
21.3757	48.1481	nnatrix	0	na	na	2013-09-22	2013	9	23	1
21.3745	48.1486	ntessellata	0	na	na	2013-09-22	2013	9	23	1
21.3719	48.1491	nnatrix	0	na	na	2013-09-22	2013	9	24	1
21.3697	48.1491	ntessellata	0	na	na	2013-09-22	2013	9	24	1
21.3648	48.1684	ntessellata	0	na	na	2013-09-22	2013	9	27	1
21.3639	48.1689	ntessellata	0	na	na	2013-09-22	2013	9	27	1
21.3891	48.2041	nnatrix	0	na	na	2013-09-22	2013	9	34	1
21.3889	48.204	ntessellata	0	na	na	2013-09-22	2013	9	34	1
21.3899	48.2047	ntessellata	0	na	na	2013-09-22	2013	9	34	1
21.3912	48.2058	ntessellata	0	na	na	2013-09-22	2013	9	35	1
21.391	48.2056	ntessellata	0	na	na	2013-09-22	2013	9	35	1
21.3927	48.2077	ntessellata	0	na	na	2013-09-22	2013	9	35	1
21.3933	48.2088	nnatrix	0	na	na	2013-09-22	2013	9	35	1
21.393	48.2084	ntessellata	0	na	na	2013-09-22	2013	9	35	1
21.394	48.2105	nnatrix	0	na	na	2013-09-22	2013	9	35	1
21.3944	48.2116	nnatrix	0	na	na	2013-09-22	2013	9	35	1
21.3946	48.212	ntessellata	322	adult	na	2013-09-22	2013	9	35	1
21.4041	48.2219	ntessellata	0	na	na	2013-09-22	2013	9	37	1
21.4132	48.2295	ntessellata	0	na	na	2013-09-22	2013	9	38	1
21.4164	48.2318	ntessellata	0	na	na	2013-09-22	2013	9	39	1
21.4178	48.2327	nnatrix	0	na	na	2013-09-22	2013	9	39	1
21.4189	48.2335	ntessellata	0	na	na	2013-09-22	2013	9	39	1
21.419	48.2335	nnatrix	0	na	na	2013-09-22	2013	9	39	1
21.3616	48.1714	ntessellata	0	na	na	2013-09-22	2013	9	45	1
21.3618	48.1723	nnatrix	0	na	na	2013-09-22	2013	9	45	1
21.3622	48.1733	ntessellata	0	na	na	2013-09-22	2013	9	45	1
21.3625	48.1741	ntessellata	0	na	na	2013-09-22	2013	9	45	1
21.3644	48.1776	nnatrix	0	na	na	2013-09-22	2013	9	45	1
21.3665	48.1789	ntessellata	179	young	na	2013-09-22	2013	9	46	1
21.3667	48.1792	nnatrix	0	na	na	2013-09-22	2013	9	46	1
21.3677	48.1807	ntessellata	683	adult	f	2013-09-22	2013	9	46	1
21.3691	48.1833	ntessellata	520	adult	na	2013-09-22	2013	9	46	1
21.3695	48.1838	nnatrix	294	subadult	na	2013-09-22	2013	9	46	1
21.3737	48.1871	nnatrix	645	adult	f	2013-09-22	2013	9	47	1
21.3746	48.1878	nnatrix	0	na	na	2013-09-22	2013	9	47	1
21.3764	48.1895	ntessellata	417	adult	na	2013-09-22	2013	9	47	1
21.3784	48.1916	ntessellata	197	young	na	2013-09-22	2013	9	48	1
21.3959	48.2205	nnatrix	0	na	na	2013-09-22	2013	9	51	1
21.3952	48.2197	nnatrix	0	na	na	2013-09-22	2013	9	51	1
21.384	48.2015	nnatrix	0	na	na	2013-09-22	2013	9	53	1
21.3515	48.1821	nnatrix	0	na	na	2013-09-22	2013	9	58	1
21.3092	48.1596	nnatrix	0	na	na	2013-10-06	2013	10	1	0
21.3165	48.1509	nnatrix	0	na	na	2013-10-06	2013	10	3	0
21.351	48.1205	nnatrix	0	na	na	2013-10-06	2013	10	8	0
21.352	48.1192	nnatrix	0	na	na	2013-10-06	2013	10	8	0
21.3539	48.1163	nnatrix	0	na	na	2013-10-06	2013	10	8	0
21.3542	48.1156	nnatrix	0	na	na	2013-10-06	2013	10	9	0
21.3542	48.1156	nnatrix	0	na	na	2013-10-06	2013	10	9	0
21.3542	48.1156	nnatrix	0	na	na	2013-10-06	2013	10	9	0
21.3542	48.1158	nnatrix	500	adult	m	2013-10-06	2013	10	9	0
21.3542	48.1158	nnatrix	0	na	na	2013-10-06	2013	10	9	0
21.354	48.1151	nnatrix	0	na	na	2013-10-06	2013	10	9	0
21.3528	48.1133	nnatrix	0	na	na	2013-10-06	2013	10	9	0
21.3531	48.1136	nnatrix	0	na	na	2013-10-06	2013	10	9	0
21.3647	48.1044	nnatrix	0	na	na	2013-10-06	2013	10	11	0
21.3646	48.1044	nnatrix	0	na	na	2013-10-06	2013	10	11	0
21.3664	48.1039	nnatrix	0	na	na	2013-10-06	2013	10	11	0
21.3706	48.1021	nnatrix	0	na	na	2013-10-06	2013	10	12	0
21.3763	48.1012	nnatrix	0	na	na	2013-10-06	2013	10	12	0
21.3895	48.1032	nnatrix	0	na	na	2013-10-06	2013	10	14	0
21.3896	48.1031	nnatrix	0	na	na	2013-10-06	2013	10	14	0
21.3901	48.1035	nnatrix	0	na	na	2013-10-06	2013	10	14	0
21.3915	48.1045	nnatrix	0	na	na	2013-10-06	2013	10	14	0
21.3916	48.1045	nnatrix	0	na	na	2013-10-06	2013	10	14	0
21.3918	48.1046	nnatrix	0	na	na	2013-10-06	2013	10	14	0
21.3919	48.1046	nnatrix	0	na	na	2013-10-06	2013	10	14	0
21.3922	48.1047	nnatrix	0	na	na	2013-10-06	2013	10	14	0
21.3924	48.1048	nnatrix	0	na	na	2013-10-06	2013	10	14	0
21.3925	48.1048	nnatrix	0	na	na	2013-10-06	2013	10	14	0
21.3926	48.1048	nnatrix	0	na	na	2013-10-06	2013	10	14	0
21.3945	48.1053	nnatrix	0	na	na	2013-10-06	2013	10	14	0
21.3958	48.1057	nnatrix	0	na	na	2013-10-06	2013	10	15	0
21.3958	48.1057	nnatrix	0	na	na	2013-10-06	2013	10	15	0
21.3958	48.1057	nnatrix	0	na	na	2013-10-06	2013	10	15	0
21.3959	48.1058	nnatrix	0	na	na	2013-10-06	2013	10	15	0
21.3963	48.1058	nnatrix	0	na	na	2013-10-06	2013	10	15	0
21.3972	48.106	nnatrix	0	na	na	2013-10-06	2013	10	15	0
21.3978	48.1061	nnatrix	0	na	na	2013-10-06	2013	10	15	0
21.405	48.1071	nnatrix	0	na	na	2013-10-06	2013	10	16	0
21.4056	48.1321	nnatrix	0	na	na	2013-10-06	2013	10	19	1
21.4036	48.133	nnatrix	0	na	na	2013-10-06	2013	10	19	1
21.4034	48.1331	nnatrix	0	na	na	2013-10-06	2013	10	19	1
21.4033	48.1332	nnatrix	0	na	na	2013-10-06	2013	10	19	1
21.4033	48.1332	nnatrix	0	na	na	2013-10-06	2013	10	19	1
21.4033	48.1332	nnatrix	0	na	na	2013-10-06	2013	10	19	1
21.4032	48.1333	ntessellata	0	na	na	2013-10-06	2013	10	19	1
21.4032	48.1333	nnatrix	0	na	na	2013-10-06	2013	10	19	1
21.4032	48.1333	nnatrix	0	na	na	2013-10-06	2013	10	19	1
21.4031	48.1334	nnatrix	0	na	na	2013-10-06	2013	10	20	1
21.4031	48.1334	nnatrix	0	na	na	2013-10-06	2013	10	20	1
21.3992	48.1405	nnatrix	0	na	na	2013-10-06	2013	10	20	1
21.3976	48.1412	nnatrix	0	na	na	2013-10-06	2013	10	21	1
21.3958	48.1418	nnatrix	0	na	na	2013-10-06	2013	10	21	1
21.3949	48.1422	nnatrix	0	na	na	2013-10-06	2013	10	21	1
21.3895	48.1446	nnatrix	0	na	na	2013-10-06	2013	10	22	1
21.3629	48.1535	nnatrix	0	na	na	2013-10-06	2013	10	25	1
21.3616	48.1563	nnatrix	0	na	na	2013-10-06	2013	10	25	1
21.3652	48.1683	nnatrix	0	na	na	2013-10-06	2013	10	27	1
21.3649	48.1684	nnatrix	0	na	na	2013-10-06	2013	10	27	1
21.3856	48.2016	ntessellata	0	na	na	2013-10-06	2013	10	34	1
21.3865	48.2022	nnatrix	0	na	na	2013-10-06	2013	10	34	1
21.3911	48.2057	ntessellata	0	na	na	2013-10-06	2013	10	35	1
21.3943	48.2113	nnatrix	0	na	na	2013-10-06	2013	10	35	1
21.3942	48.2112	nnatrix	0	na	na	2013-10-06	2013	10	35	1
21.3942	48.2111	nnatrix	0	na	na	2013-10-06	2013	10	35	1
21.4041	48.222	ntessellata	0	na	na	2013-10-06	2013	10	37	1
21.4141	48.1046	nnatrix	0	na	na	2013-10-06	2013	10	40	0
21.414	48.1048	nnatrix	0	na	na	2013-10-06	2013	10	40	0
21.4158	48.1021	nnatrix	0	na	na	2013-10-06	2013	10	40	0
21.4161	48.1017	nnatrix	0	na	na	2013-10-06	2013	10	40	0
21.4107	48.0813	nnatrix	0	na	na	2013-10-06	2013	10	43	0
21.4103	48.0812	nnatrix	0	na	na	2013-10-06	2013	10	43	0
21.4105	48.0686	nnatrix	0	na	na	2013-10-06	2013	10	44	0
21.3617	48.1721	nnatrix	0	na	na	2013-10-06	2013	10	45	1
21.3746	48.1878	nnatrix	0	na	na	2013-10-06	2013	10	47	1
21.3966	48.2216	nnatrix	0	na	na	2013-10-06	2013	10	51	1
21.3947	48.2189	nnatrix	0	na	na	2013-10-06	2013	10	51	1
21.3945	48.2186	nnatrix	0	na	na	2013-10-06	2013	10	51	1
21.3923	48.2147	nnatrix	0	na	na	2013-10-06	2013	10	52	1
21.3921	48.2124	nnatrix	0	na	na	2013-10-06	2013	10	52	1
21.392	48.2123	nnatrix	0	na	na	2013-10-06	2013	10	52	1
21.3919	48.2109	nnatrix	0	na	na	2013-10-06	2013	10	52	1
21.3471	48.1755	nnatrix	0	na	na	2013-10-06	2013	10	58	1
21.3323	48.1431	nnatrix	0	na	na	2013-10-20	2013	10	5	0
21.3346	48.1424	nnatrix	0	na	na	2013-10-20	2013	10	5	0
21.3732	48.1009	nnatrix	0	na	na	2013-10-20	2013	10	12	0
21.377	48.1013	nnatrix	0	na	na	2013-10-20	2013	10	12	0
21.3808	48.1005	nnatrix	0	na	na	2013-10-20	2013	10	13	0
21.3818	48.1006	nnatrix	0	na	na	2013-10-20	2013	10	13	0
21.3894	48.1031	nnatrix	0	na	na	2013-10-20	2013	10	14	0
21.3901	48.1035	nnatrix	0	na	na	2013-10-20	2013	10	14	0
21.3917	48.1046	nnatrix	0	na	na	2013-10-20	2013	10	14	0
21.3923	48.1047	nnatrix	0	na	na	2013-10-20	2013	10	14	0
21.3952	48.1055	nnatrix	0	na	na	2013-10-20	2013	10	14	0
21.3955	48.1057	nnatrix	0	na	na	2013-10-20	2013	10	15	0
21.3968	48.1059	nnatrix	0	na	na	2013-10-20	2013	10	15	0
21.3993	48.1062	nnatrix	0	na	na	2013-10-20	2013	10	15	0
21.4	48.1062	nnatrix	0	na	na	2013-10-20	2013	10	15	0
21.3969	48.1415	nnatrix	0	na	na	2013-10-20	2013	10	21	1
21.3952	48.142	nnatrix	0	na	na	2013-10-20	2013	10	21	1
21.3675	48.1492	nnatrix	0	na	na	2013-10-20	2013	10	24	1
21.3613	48.1566	nnatrix	0	na	na	2013-10-20	2013	10	25	1
21.3681	48.1892	nnatrix	182	young	na	2013-10-20	2013	10	31	1
21.3748	48.1941	nnatrix	0	na	na	2013-10-20	2013	10	32	1
21.3816	48.199	nnatrix	0	na	na	2013-10-20	2013	10	33	1
21.3905	48.2051	nnatrix	0	na	na	2013-10-20	2013	10	34	1
21.3941	48.2109	nnatrix	0	na	na	2013-10-20	2013	10	35	1
21.3947	48.2122	nnatrix	0	na	na	2013-10-20	2013	10	35	1
21.4059	48.2236	nnatrix	0	na	na	2013-10-20	2013	10	37	1
21.4143	48.1042	nnatrix	0	na	na	2013-10-20	2013	10	40	0
21.4151	48.1031	nnatrix	0	na	na	2013-10-20	2013	10	40	0
21.4164	48.0885	nnatrix	0	na	na	2013-10-20	2013	10	42	0
21.4102	48.0746	nnatrix	0	na	na	2013-10-20	2013	10	44	0
21.362	48.1729	nnatrix	0	na	na	2013-10-20	2013	10	45	1
21.3619	48.1727	nnatrix	0	na	na	2013-10-20	2013	10	45	1
21.3633	48.1761	nnatrix	0	na	na	2013-10-20	2013	10	45	1
21.3725	48.1862	nnatrix	212	subadult	na	2013-10-20	2013	10	47	1
21.4086	48.2382	nnatrix	0	na	na	2013-10-20	2013	10	49	1
21.4041	48.2324	nnatrix	0	na	na	2013-10-20	2013	10	49	1
21.3978	48.2234	nnatrix	0	na	na	2013-10-20	2013	10	50	1
21.3958	48.2205	nnatrix	0	na	na	2013-10-20	2013	10	51	1
21.3961	48.2208	nnatrix	0	na	na	2013-10-20	2013	10	51	1
21.3953	48.2197	nnatrix	0	na	na	2013-10-20	2013	10	51	1
21.3953	48.2197	nnatrix	0	na	na	2013-10-20	2013	10	51	1
21.3813	48.2002	nnatrix	0	na	na	2013-10-20	2013	10	54	1
21.3808	48.1999	nnatrix	0	na	na	2013-10-20	2013	10	54	1
21.3719	48.1954	nnatrix	0	na	na	2013-10-20	2013	10	55	1
21.3719	48.1954	nnatrix	0	na	na	2013-10-20	2013	10	55	1
21.3471	48.1755	nnatrix	0	na	na	2013-10-20	2013	10	58	1
21.3513	48.1207	nnatrix	0	na	na	2013-11-03	2013	11	8	0
21.3541	48.1071	nnatrix	0	na	na	2013-11-03	2013	11	10	0
21.3668	48.1037	nnatrix	0	na	na	2013-11-03	2013	11	11	0
21.3778	48.1012	nnatrix	0	na	na	2013-11-03	2013	11	12	0
21.3915	48.1044	nnatrix	0	na	na	2013-11-03	2013	11	14	0
21.3919	48.1046	nnatrix	0	na	na	2013-11-03	2013	11	14	0
21.3943	48.1053	nnatrix	0	na	na	2013-11-03	2013	11	14	0
21.3959	48.1057	nnatrix	0	na	na	2013-11-03	2013	11	15	0
21.3961	48.1058	nnatrix	0	na	na	2013-11-03	2013	11	15	0
21.4061	48.1318	nnatrix	0	na	na	2013-11-03	2013	11	19	1
21.4057	48.132	nnatrix	0	na	na	2013-11-03	2013	11	19	1
21.4035	48.133	nnatrix	0	na	na	2013-11-03	2013	11	19	1
21.4034	48.133	nnatrix	0	na	na	2013-11-03	2013	11	19	1
21.4032	48.1332	nnatrix	0	na	na	2013-11-03	2013	11	19	1
21.403	48.1334	nnatrix	0	na	na	2013-11-03	2013	11	20	1
21.377	48.1477	nnatrix	0	na	na	2013-11-03	2013	11	23	1
21.3753	48.1483	nnatrix	0	na	na	2013-11-03	2013	11	23	1
21.3638	48.1689	nnatrix	0	na	na	2013-11-03	2013	11	27	1
21.3614	48.1708	nnatrix	0	na	na	2013-11-03	2013	11	45	1
21.3622	48.1734	nnatrix	0	na	na	2013-11-03	2013	11	45	1
21.3639	48.1849	nnatrix	680	adult	f	2020-04-06	2020	4	31	1
21.3958	48.2137	ntessellata	209	subadult	na	2020-04-06	2020	4	36	1
21.4036	48.2215	nnatrix	502	adult	m	2020-04-06	2020	4	37	1
21.3692	48.1835	ntessellata	194	young	m	2020-04-06	2020	4	46	1
21.3792	48.1921	nnatrix	555	adult	m	2020-04-06	2020	4	48	1
21.4123	48.1216	ntessellata	520	adult	m	2020-04-20	2020	4	18	1
21.4123	48.1215	ntessellata	430	adult	m	2020-04-20	2020	4	18	1
21.3963	48.1416	nnatrix	230	subadult	na	2020-04-20	2020	4	21	1
21.3653	48.1633	nnatrix	440	adult	m	2020-04-20	2020	4	26	1
21.3941	48.2111	nnatrix	0	na	na	2020-04-20	2020	4	35	1
21.3962	48.2141	nnatrix	363	adult	m	2020-04-20	2020	4	36	1
21.3979	48.1061	nnatrix	189	young	m	2020-05-05	2020	5	15	0
21.4065	48.1316	ntessellata	430	adult	f	2020-05-05	2020	5	19	1
21.4066	48.1316	ntessellata	410	adult	m	2020-05-05	2020	5	19	1
21.4067	48.1315	nnatrix	195	young	na	2020-05-05	2020	5	19	1
21.4041	48.1326	ntessellata	408	adult	f	2020-05-05	2020	5	19	1
21.4044	48.1327	nnatrix	0	na	na	2020-05-05	2020	5	19	1
21.4044	48.1325	nnatrix	0	na	na	2020-05-05	2020	5	19	1
21.4012	48.1373	ntessellata	712	adult	f	2020-05-05	2020	5	20	1
21.3991	48.1405	nnatrix	200	young	na	2020-05-05	2020	5	20	1
21.3824	48.1481	nnatrix	0	na	na	2020-05-05	2020	5	22	1
21.3818	48.148	nnatrix	0	na	na	2020-05-05	2020	5	23	1
21.392	48.2065	nnatrix	440	adult	f	2020-05-05	2020	5	35	1
21.3941	48.211	ntessellata	200	young	na	2020-05-05	2020	5	35	1
21.3943	48.2113	nnatrix	0	na	na	2020-05-05	2020	5	35	1
21.3943	48.2113	nnatrix	0	na	na	2020-05-05	2020	5	35	1
21.3943	48.2113	nnatrix	210	subadult	na	2020-05-05	2020	5	35	1
21.4171	48.1001	nnatrix	195	young	na	2020-05-05	2020	5	40	0
21.4106	48.071	nnatrix	160	young	na	2020-05-05	2020	5	44	0
21.3671	48.1802	ntessellata	201	subadult	na	2020-05-05	2020	5	46	1
21.3754	48.1883	ntessellata	555	adult	m	2020-05-05	2020	5	47	1
21.3772	48.1905	nnatrix	161	young	na	2020-05-05	2020	5	47	1
21.3925	48.2155	nnatrix	468	adult	f	2020-05-05	2020	5	51	1
21.3223	48.1459	ntessellata	490	adult	m	2020-06-08	2020	6	3	0
21.4051	48.1324	nnatrix	0	na	na	2020-06-08	2020	6	19	1
21.4052	48.1323	nnatrix	240	subadult	na	2020-06-08	2020	6	19	1
21.404	48.1327	nnatrix	0	na	na	2020-06-08	2020	6	19	1
21.4045	48.1326	nnatrix	0	na	na	2020-06-08	2020	6	19	1
21.4032	48.1332	nnatrix	0	na	na	2020-06-08	2020	6	19	1
21.3992	48.1405	nnatrix	410	adult	m	2020-06-08	2020	6	20	1
21.386	48.1462	nnatrix	590	adult	f	2020-06-08	2020	6	22	1
21.3639	48.1688	ntessellata	390	adult	m	2020-06-08	2020	6	27	1
21.3639	48.1687	ntessellata	0	na	na	2020-06-08	2020	6	27	1
21.363	48.1694	ntessellata	460	adult	m	2020-06-08	2020	6	27	1
21.4088	48.2261	nnatrix	175	young	na	2020-06-08	2020	6	38	1
21.4131	48.1063	nnatrix	380	adult	m	2020-06-08	2020	6	40	0
21.4036	48.2214	nnatrix	200	young	na	2020-07-06	2020	7	37	1
21.4053	48.2229	nnatrix	565	adult	f	2020-07-06	2020	7	37	1
21.4058	48.2234	ntessellata	525	adult	f	2020-07-16	2020	7	37	1
21.407	48.2245	ntessellata	545	adult	f	2020-08-18	2020	8	37	1
21.4107	48.2278	ntessellata	610	adult	f	2020-08-18	2020	8	38	1
21.4063	48.1318	nnatrix	0	na	na	2020-08-31	2020	8	19	1
21.4055	48.1322	nnatrix	0	na	na	2020-08-31	2020	8	19	1
21.4054	48.1322	nnatrix	0	na	na	2020-08-31	2020	8	19	1
21.4031	48.1334	ntessellata	345	adult	m	2020-08-31	2020	8	19	1
21.4032	48.1332	nnatrix	0	na	na	2020-08-31	2020	8	19	1
21.4033	48.1332	nnatrix	150	young	na	2020-08-31	2020	8	19	1
21.4033	48.1331	nnatrix	0	na	na	2020-08-31	2020	8	19	1
21.4034	48.1331	nnatrix	520	adult	m	2020-08-31	2020	8	19	1
21.4034	48.1331	nnatrix	160	young	na	2020-08-31	2020	8	19	1
21.4034	48.1331	nnatrix	365	adult	na	2020-08-31	2020	8	19	1
21.4035	48.133	nnatrix	160	young	na	2020-08-31	2020	8	19	1
21.4035	48.1329	nnatrix	0	na	na	2020-08-31	2020	8	19	1
21.4037	48.133	nnatrix	170	young	na	2020-08-31	2020	8	19	1
21.4027	48.1341	nnatrix	160	young	na	2020-08-31	2020	8	20	1
21.4028	48.1339	nnatrix	170	young	na	2020-08-31	2020	8	20	1
21.4029	48.1337	ntessellata	560	adult	f	2020-08-31	2020	8	20	1
21.4029	48.1336	nnatrix	0	na	na	2020-08-31	2020	8	20	1
21.4031	48.1334	nnatrix	365	adult	m	2020-08-31	2020	8	20	1
21.4025	48.1345	nnatrix	0	na	f	2020-08-31	2020	8	20	1
21.4026	48.1343	ntessellata	0	na	f	2020-08-31	2020	8	20	1
21.4026	48.1342	ntessellata	160	young	na	2020-08-31	2020	8	20	1
21.3986	48.1409	nnatrix	510	adult	f	2020-08-31	2020	8	20	1
21.3968	48.1415	nnatrix	270	subadult	na	2020-08-31	2020	8	21	1
21.3969	48.1414	nnatrix	330	adult	m	2020-08-31	2020	8	21	1
21.3972	48.1414	nnatrix	0	na	na	2020-08-31	2020	8	21	1
21.3961	48.1417	nnatrix	720	adult	f	2020-08-31	2020	8	21	1
21.3963	48.1416	nnatrix	0	na	na	2020-08-31	2020	8	21	1
21.3963	48.1416	nnatrix	0	na	na	2020-08-31	2020	8	21	1
21.3964	48.1416	nnatrix	445	adult	m	2020-08-31	2020	8	21	1
21.3949	48.1421	nnatrix	360	adult	m	2020-08-31	2020	8	21	1
21.3649	48.1685	nnatrix	132	young	na	2020-08-31	2020	8	27	1
21.3638	48.1689	ntessellata	0	na	m	2020-08-31	2020	8	27	1
21.364	48.1688	ntessellata	400	adult	m	2020-08-31	2020	8	27	1
21.3643	48.1688	ntessellata	400	adult	m	2020-08-31	2020	8	27	1
21.3643	48.1688	ntessellata	470	adult	m	2020-08-31	2020	8	27	1
21.3635	48.169	ntessellata	0	na	m	2020-08-31	2020	8	27	1
21.3682	48.1893	nnatrix	0	na	na	2020-08-31	2020	8	31	1
21.3805	48.1983	nnatrix	360	adult	f	2020-08-31	2020	8	33	1
21.3895	48.2043	nnatrix	340	adult	m	2020-08-31	2020	8	34	1
21.3902	48.2049	nnatrix	455	adult	m	2020-08-31	2020	8	34	1
21.3939	48.2103	nnatrix	415	adult	m	2020-08-31	2020	8	35	1
21.394	48.2104	nnatrix	580	adult	f	2020-08-31	2020	8	35	1
21.394	48.2105	nnatrix	350	adult	na	2020-08-31	2020	8	35	1
21.3942	48.211	ntessellata	198	young	na	2020-08-31	2020	8	35	1
21.3942	48.211	ntessellata	180	young	na	2020-08-31	2020	8	35	1
21.3943	48.2113	ntessellata	170	young	na	2020-08-31	2020	8	35	1
21.3943	48.2112	nnatrix	165	young	na	2020-08-31	2020	8	35	1
21.3943	48.2113	nnatrix	0	na	na	2020-08-31	2020	8	35	1
21.3943	48.2113	nnatrix	160	young	na	2020-08-31	2020	8	35	1
21.4014	48.2195	nnatrix	180	young	na	2020-08-31	2020	8	36	1
21.4038	48.2216	nnatrix	360	adult	na	2020-08-31	2020	8	37	1
21.4053	48.223	nnatrix	385	adult	m	2020-08-31	2020	8	37	1
21.4087	48.226	nnatrix	170	young	na	2020-08-31	2020	8	38	1
21.4087	48.2261	nnatrix	160	young	na	2020-08-31	2020	8	38	1
21.4144	48.1042	nnatrix	340	adult	m	2020-08-31	2020	8	40	0
21.4145	48.1041	nnatrix	160	young	na	2020-08-31	2020	8	40	0
21.3622	48.1733	ntessellata	0	na	na	2020-08-31	2020	8	45	1
21.3953	48.2198	nnatrix	0	na	na	2020-08-31	2020	8	51	1
21.3895	48.205	nnatrix	0	na	na	2020-08-31	2020	8	53	1
21.3884	48.204	nnatrix	0	na	na	2020-08-31	2020	8	53	1
21.3717	48.1954	nnatrix	420	adult	m	2020-08-31	2020	8	55	1
21.4065	48.1316	nnatrix	400	adult	na	2020-09-09	2020	9	19	1
21.4065	48.1317	nnatrix	585	adult	m	2020-09-09	2020	9	19	1
21.4064	48.1317	nnatrix	0	na	na	2020-09-09	2020	9	19	1
21.4064	48.1317	nnatrix	166	young	na	2020-09-09	2020	9	19	1
21.4061	48.1318	nnatrix	0	na	na	2020-09-09	2020	9	19	1
21.406	48.1318	nnatrix	0	na	na	2020-09-09	2020	9	19	1
21.4058	48.132	nnatrix	0	na	na	2020-09-09	2020	9	19	1
21.4055	48.1321	ntessellata	530	adult	f	2020-09-09	2020	9	19	1
21.4053	48.1322	nnatrix	0	na	na	2020-09-09	2020	9	19	1
21.4051	48.1323	nnatrix	371	adult	m	2020-09-09	2020	9	19	1
21.4046	48.1326	nnatrix	0	na	na	2020-09-09	2020	9	19	1
21.404	48.1326	nnatrix	0	na	na	2020-09-09	2020	9	19	1
21.4034	48.1331	nnatrix	0	na	na	2020-09-09	2020	9	19	1
21.4034	48.1331	nnatrix	0	na	na	2020-09-09	2020	9	19	1
21.4034	48.1331	nnatrix	0	na	na	2020-09-09	2020	9	19	1
21.4034	48.1331	nnatrix	0	na	na	2020-09-09	2020	9	19	1
21.4033	48.133	nnatrix	187	young	na	2020-09-09	2020	9	19	1
21.4032	48.1332	nnatrix	390	adult	na	2020-09-09	2020	9	19	1
21.4032	48.1332	nnatrix	180	young	na	2020-09-09	2020	9	19	1
21.4032	48.1333	nnatrix	0	na	na	2020-09-09	2020	9	19	1
21.4031	48.1333	nnatrix	165	young	na	2020-09-09	2020	9	19	1
21.4031	48.1334	nnatrix	175	young	na	2020-09-09	2020	9	19	1
21.403	48.1333	nnatrix	0	na	na	2020-09-09	2020	9	19	1
21.4029	48.1336	nnatrix	0	na	na	2020-09-09	2020	9	20	1
21.4029	48.1337	nnatrix	380	adult	m	2020-09-09	2020	9	20	1
21.4029	48.1337	nnatrix	0	na	na	2020-09-09	2020	9	20	1
21.4029	48.1338	ntessellata	200	young	na	2020-09-09	2020	9	20	1
21.4027	48.1338	nnatrix	0	na	na	2020-09-09	2020	9	20	1
21.4027	48.1338	nnatrix	170	young	na	2020-09-09	2020	9	20	1
21.4028	48.1339	nnatrix	160	young	na	2020-09-09	2020	9	20	1
21.4028	48.1339	nnatrix	0	na	na	2020-09-09	2020	9	20	1
21.4028	48.1339	nnatrix	160	young	na	2020-09-09	2020	9	20	1
21.4027	48.1339	ntessellata	635	adult	f	2020-09-09	2020	9	20	1
21.4027	48.1338	nnatrix	360	adult	m	2020-09-09	2020	9	20	1
21.4028	48.134	ntessellata	410	adult	m	2020-09-09	2020	9	20	1
21.4027	48.1341	nnatrix	0	na	na	2020-09-09	2020	9	20	1
21.4027	48.1341	nnatrix	0	na	na	2020-09-09	2020	9	20	1
21.4025	48.1343	nnatrix	0	na	na	2020-09-09	2020	9	20	1
21.4026	48.1343	nnatrix	0	na	na	2020-09-09	2020	9	20	1
21.4026	48.1342	nnatrix	280	subadult	na	2020-09-09	2020	9	20	1
21.4026	48.1343	nnatrix	0	na	na	2020-09-09	2020	9	20	1
21.4025	48.1345	nnatrix	0	na	na	2020-09-09	2020	9	20	1
21.4025	48.1346	ntessellata	380	adult	m	2020-09-09	2020	9	20	1
21.3995	48.1403	nnatrix	0	na	na	2020-09-09	2020	9	20	1
21.3995	48.1403	nnatrix	320	adult	m	2020-09-09	2020	9	20	1
21.3994	48.1403	nnatrix	390	adult	m	2020-09-09	2020	9	20	1
21.3991	48.1407	ntessellata	0	na	na	2020-09-09	2020	9	20	1
21.3962	48.1416	ntessellata	300	subadult	na	2020-09-09	2020	9	21	1
21.3964	48.1416	nnatrix	0	na	na	2020-09-09	2020	9	21	1
21.3964	48.1416	nnatrix	400	adult	na	2020-09-09	2020	9	21	1
21.3965	48.1416	ntessellata	380	adult	m	2020-09-09	2020	9	21	1
21.3965	48.1416	nnatrix	370	adult	f	2020-09-09	2020	9	21	1
21.3965	48.1415	nnatrix	340	adult	m	2020-09-09	2020	9	21	1
21.3956	48.1419	nnatrix	520	adult	f	2020-09-09	2020	9	21	1
21.3959	48.1418	nnatrix	460	adult	f	2020-09-09	2020	9	21	1
21.3946	48.1424	nnatrix	400	adult	na	2020-09-09	2020	9	21	1
21.3908	48.1441	nnatrix	380	adult	f	2020-09-09	2020	9	21	1
21.3801	48.1476	nnatrix	0	na	na	2020-09-09	2020	9	23	1
21.3798	48.1476	ntessellata	180	young	na	2020-09-09	2020	9	23	1
21.3792	48.1475	ntessellata	160	young	na	2020-09-09	2020	9	23	1
21.3791	48.1474	nnatrix	330	adult	m	2020-09-09	2020	9	23	1
21.3792	48.1474	ntessellata	300	subadult	na	2020-09-09	2020	9	23	1
21.3789	48.1474	ntessellata	0	na	na	2020-09-09	2020	9	23	1
21.3785	48.1474	nnatrix	0	na	na	2020-09-09	2020	9	23	1
21.3785	48.1475	ntessellata	0	na	na	2020-09-09	2020	9	23	1
21.3782	48.1475	nnatrix	0	na	na	2020-09-09	2020	9	23	1
21.3782	48.1475	nnatrix	0	na	na	2020-09-09	2020	9	23	1
21.3782	48.1475	nnatrix	0	na	na	2020-09-09	2020	9	23	1
21.378	48.1475	nnatrix	0	na	na	2020-09-09	2020	9	23	1
21.378	48.1475	nnatrix	0	na	na	2020-09-09	2020	9	23	1
21.3766	48.1478	ntessellata	0	na	na	2020-09-09	2020	9	23	1
21.3757	48.1482	nnatrix	0	na	na	2020-09-09	2020	9	23	1
21.3757	48.1482	nnatrix	390	adult	f	2020-09-09	2020	9	23	1
21.3755	48.1483	ntessellata	200	young	na	2020-09-09	2020	9	23	1
21.3754	48.1484	nnatrix	0	na	na	2020-09-09	2020	9	23	1
21.3752	48.1484	ntessellata	190	young	na	2020-09-09	2020	9	23	1
21.3751	48.1485	nnatrix	0	na	na	2020-09-09	2020	9	23	1
21.3751	48.1485	nnatrix	0	na	na	2020-09-09	2020	9	23	1
21.375	48.1485	ntessellata	0	na	na	2020-09-09	2020	9	23	1
21.375	48.1485	nnatrix	0	na	na	2020-09-09	2020	9	23	1
21.375	48.1485	ntessellata	300	subadult	na	2020-09-09	2020	9	23	1
21.375	48.1485	ntessellata	160	young	na	2020-09-09	2020	9	23	1
21.375	48.1485	ntessellata	170	young	na	2020-09-09	2020	9	23	1
21.3675	48.1493	nnatrix	0	na	na	2020-09-09	2020	9	24	1
21.3674	48.1493	nnatrix	0	na	na	2020-09-09	2020	9	24	1
21.3674	48.1493	nnatrix	270	subadult	m	2020-09-09	2020	9	24	1
21.3672	48.1493	nnatrix	290	subadult	na	2020-09-09	2020	9	24	1
21.3648	48.1499	nnatrix	0	na	na	2020-09-09	2020	9	24	1
21.3653	48.1682	ntessellata	0	na	na	2020-09-09	2020	9	27	1
21.3653	48.1682	ntessellata	0	na	na	2020-09-09	2020	9	27	1
21.3654	48.1682	ntessellata	0	na	na	2020-09-09	2020	9	27	1
21.3654	48.1682	ntessellata	0	na	na	2020-09-09	2020	9	27	1
21.3646	48.1687	nnatrix	0	na	na	2020-09-09	2020	9	27	1
21.3648	48.1687	nnatrix	0	na	na	2020-09-09	2020	9	27	1
21.3651	48.1684	ntessellata	160	young	na	2020-09-09	2020	9	27	1
21.365	48.1684	ntessellata	0	na	na	2020-09-09	2020	9	27	1
21.3651	48.1684	ntessellata	0	na	na	2020-09-09	2020	9	27	1
21.3651	48.1684	ntessellata	0	na	na	2020-09-09	2020	9	27	1
21.3651	48.1684	ntessellata	0	na	na	2020-09-09	2020	9	27	1
21.3651	48.1684	ntessellata	0	na	na	2020-09-09	2020	9	27	1
21.3651	48.1684	ntessellata	520	adult	f	2020-09-09	2020	9	27	1
21.3651	48.1684	nnatrix	390	adult	na	2020-09-09	2020	9	27	1
21.3652	48.1684	nnatrix	320	adult	m	2020-09-09	2020	9	27	1
21.3652	48.1683	ntessellata	170	young	na	2020-09-09	2020	9	27	1
21.3652	48.1683	ntessellata	0	na	na	2020-09-09	2020	9	27	1
21.364	48.1689	ntessellata	0	na	na	2020-09-09	2020	9	27	1
21.3641	48.1689	ntessellata	0	na	na	2020-09-09	2020	9	27	1
21.3641	48.1689	nnatrix	0	na	na	2020-09-09	2020	9	27	1
21.3641	48.1689	nnatrix	0	na	na	2020-09-09	2020	9	27	1
21.3642	48.1688	nnatrix	0	na	na	2020-09-09	2020	9	27	1
21.3643	48.1688	ntessellata	0	na	na	2020-09-09	2020	9	27	1
21.3645	48.1687	ntessellata	0	na	na	2020-09-09	2020	9	27	1
21.3645	48.1687	ntessellata	0	na	na	2020-09-09	2020	9	27	1
21.3645	48.1687	ntessellata	0	na	na	2020-09-09	2020	9	27	1
21.3644	48.1688	ntessellata	0	na	na	2020-09-09	2020	9	27	1
21.3644	48.1688	ntessellata	0	na	na	2020-09-09	2020	9	27	1
21.3644	48.1688	ntessellata	0	na	na	2020-09-09	2020	9	27	1
21.3644	48.1688	ntessellata	0	na	na	2020-09-09	2020	9	27	1
21.3643	48.1688	ntessellata	0	na	na	2020-09-09	2020	9	27	1
21.3643	48.1688	ntessellata	0	na	na	2020-09-09	2020	9	27	1
21.3644	48.1687	ntessellata	195	young	na	2020-09-09	2020	9	27	1
21.3645	48.1687	ntessellata	185	young	na	2020-09-09	2020	9	27	1
21.3624	48.1695	ntessellata	0	na	na	2020-09-09	2020	9	27	1
21.3622	48.1695	nnatrix	160	young	na	2020-09-09	2020	9	27	1
21.3683	48.1894	nnatrix	310	adult	m	2020-09-09	2020	9	31	1
21.3683	48.1894	nnatrix	310	adult	m	2020-09-09	2020	9	31	1
21.3698	48.1908	nnatrix	180	young	na	2020-09-09	2020	9	32	1
21.3798	48.1977	nnatrix	0	na	na	2020-09-09	2020	9	33	1
21.3944	48.2115	nnatrix	410	adult	m	2020-09-09	2020	9	35	1
21.3943	48.2113	nnatrix	0	na	na	2020-09-09	2020	9	35	1
21.3952	48.2127	nnatrix	350	adult	na	2020-09-09	2020	9	35	1
21.3953	48.2128	nnatrix	310	adult	na	2020-09-09	2020	9	35	1
21.4003	48.2186	nnatrix	480	adult	m	2020-09-09	2020	9	36	1
21.4017	48.2198	nnatrix	0	na	na	2020-09-09	2020	9	37	1
21.4097	48.2268	nnatrix	450	adult	f	2020-09-09	2020	9	38	1
21.4134	48.2296	nnatrix	0	na	m	2020-09-09	2020	9	38	1
21.3766	48.198	ntessellata	160	young	na	2020-09-09	2020	9	54	1
21.3542	48.1156	nnatrix	0	na	na	2020-09-22	2020	9	9	0
21.406	48.132	nnatrix	0	na	na	2020-09-22	2020	9	19	1
21.4059	48.132	nnatrix	0	na	na	2020-09-22	2020	9	19	1
21.4057	48.132	nnatrix	425	adult	f	2020-09-22	2020	9	19	1
21.4053	48.1322	nnatrix	0	na	na	2020-09-22	2020	9	19	1
21.4053	48.1323	nnatrix	0	na	na	2020-09-22	2020	9	19	1
21.4052	48.1322	nnatrix	370	adult	m	2020-09-22	2020	9	19	1
21.4052	48.1323	ntessellata	360	adult	m	2020-09-22	2020	9	19	1
21.405	48.1324	nnatrix	0	na	na	2020-09-22	2020	9	19	1
21.4035	48.1331	nnatrix	0	na	na	2020-09-22	2020	9	19	1
21.4033	48.1331	ntessellata	600	adult	f	2020-09-22	2020	9	19	1
21.4032	48.1333	nnatrix	0	na	na	2020-09-22	2020	9	19	1
21.4032	48.1333	nnatrix	0	na	na	2020-09-22	2020	9	19	1
21.4029	48.1337	nnatrix	0	na	na	2020-09-22	2020	9	20	1
21.4028	48.1339	nnatrix	330	adult	m	2020-09-22	2020	9	20	1
21.4029	48.1339	nnatrix	160	young	na	2020-09-22	2020	9	20	1
21.4028	48.1339	nnatrix	170	young	na	2020-09-22	2020	9	20	1
21.4027	48.1339	nnatrix	0	na	na	2020-09-22	2020	9	20	1
21.4028	48.134	nnatrix	0	na	na	2020-09-22	2020	9	20	1
21.4027	48.1341	nnatrix	0	na	na	2020-09-22	2020	9	20	1
21.4027	48.1341	nnatrix	170	young	na	2020-09-22	2020	9	20	1
21.4027	48.1342	ntessellata	0	na	na	2020-09-22	2020	9	20	1
21.4026	48.1343	nnatrix	0	na	na	2020-09-22	2020	9	20	1
21.3997	48.1401	ntessellata	290	subadult	m	2020-09-22	2020	9	20	1
21.3995	48.1403	nnatrix	350	adult	f	2020-09-22	2020	9	20	1
21.3994	48.1403	nnatrix	0	na	na	2020-09-22	2020	9	20	1
21.3982	48.141	ntessellata	190	young	na	2020-09-22	2020	9	21	1
21.397	48.1414	nnatrix	345	adult	f	2020-09-22	2020	9	21	1
21.3966	48.1416	nnatrix	340	adult	f	2020-09-22	2020	9	21	1
21.3967	48.1415	nnatrix	410	adult	m	2020-09-22	2020	9	21	1
21.3956	48.1419	nnatrix	0	na	na	2020-09-22	2020	9	21	1
21.3959	48.1418	nnatrix	0	na	na	2020-09-22	2020	9	21	1
21.3773	48.1477	ntessellata	170	young	na	2020-09-22	2020	9	23	1
21.3772	48.1477	ntessellata	180	young	na	2020-09-22	2020	9	23	1
21.3763	48.1479	nnatrix	375	adult	f	2020-09-22	2020	9	23	1
21.3762	48.148	ntessellata	320	adult	na	2020-09-22	2020	9	23	1
21.3753	48.1484	nnatrix	0	na	na	2020-09-22	2020	9	23	1
21.3752	48.1484	ntessellata	0	na	na	2020-09-22	2020	9	23	1
21.3751	48.1485	nnatrix	0	na	na	2020-09-22	2020	9	23	1
21.3751	48.1485	nnatrix	0	na	na	2020-09-22	2020	9	23	1
21.375	48.1485	nnatrix	0	na	na	2020-09-22	2020	9	23	1
21.375	48.1485	ntessellata	0	na	na	2020-09-22	2020	9	23	1
21.3749	48.1485	ntessellata	170	young	na	2020-09-22	2020	9	23	1
21.3749	48.1485	ntessellata	315	adult	f	2020-09-22	2020	9	23	1
21.3649	48.1684	ntessellata	160	young	na	2020-09-22	2020	9	27	1
21.3649	48.1685	ntessellata	0	na	na	2020-09-22	2020	9	27	1
21.3645	48.1687	ntessellata	160	young	na	2020-09-22	2020	9	27	1
21.3644	48.1688	ntessellata	0	na	na	2020-09-22	2020	9	27	1
21.3642	48.1688	ntessellata	170	young	na	2020-09-22	2020	9	27	1
21.364	48.1689	ntessellata	370	adult	na	2020-09-22	2020	9	27	1
21.364	48.1689	ntessellata	0	na	na	2020-09-22	2020	9	27	1
21.3638	48.169	nnatrix	0	na	na	2020-09-22	2020	9	27	1
21.3684	48.1895	nnatrix	0	na	na	2020-09-22	2020	9	31	1
21.4071	48.2246	nnatrix	270	subadult	f	2020-09-22	2020	9	37	1
21.4104	48.2275	nnatrix	460	adult	m	2020-09-22	2020	9	38	1
21.368	48.181	nnatrix	210	subadult	na	2020-09-22	2020	9	46	1
21.4114	48.1261	nnatrix	260	subadult	na	2020-10-09	2020	10	18	1
21.4065	48.1317	nnatrix	0	na	na	2020-10-09	2020	10	19	1
21.4064	48.1317	nnatrix	0	na	na	2020-10-09	2020	10	19	1
21.4062	48.1318	nnatrix	0	na	na	2020-10-09	2020	10	19	1
21.4061	48.1318	nnatrix	300	subadult	m	2020-10-09	2020	10	19	1
21.406	48.1319	nnatrix	0	na	na	2020-10-09	2020	10	19	1
21.4058	48.1319	nnatrix	0	na	na	2020-10-09	2020	10	19	1
21.4055	48.1321	nnatrix	0	na	na	2020-10-09	2020	10	19	1
21.4054	48.1322	nnatrix	0	na	na	2020-10-09	2020	10	19	1
21.4054	48.1322	nnatrix	0	na	na	2020-10-09	2020	10	19	1
21.4053	48.1322	nnatrix	0	na	na	2020-10-09	2020	10	19	1
21.4039	48.1327	nnatrix	0	na	na	2020-10-09	2020	10	19	1
21.4035	48.133	nnatrix	430	adult	na	2020-10-09	2020	10	19	1
21.4035	48.133	ntessellata	0	na	na	2020-10-09	2020	10	19	1
21.4034	48.133	nnatrix	480	adult	f	2020-10-09	2020	10	19	1
21.4034	48.1331	nnatrix	0	na	na	2020-10-09	2020	10	19	1
21.4034	48.1331	nnatrix	0	na	na	2020-10-09	2020	10	19	1
21.4033	48.1331	nnatrix	0	na	na	2020-10-09	2020	10	19	1
21.4033	48.1332	nnatrix	0	na	na	2020-10-09	2020	10	19	1
21.4033	48.1332	nnatrix	0	na	na	2020-10-09	2020	10	19	1
21.4032	48.1332	nnatrix	0	na	na	2020-10-09	2020	10	19	1
21.4032	48.1332	nnatrix	0	na	na	2020-10-09	2020	10	19	1
21.4032	48.1332	nnatrix	0	na	na	2020-10-09	2020	10	19	1
21.4032	48.1333	nnatrix	0	na	na	2020-10-09	2020	10	19	1
21.4031	48.1333	nnatrix	0	na	na	2020-10-09	2020	10	19	1
21.4031	48.1333	nnatrix	0	na	na	2020-10-09	2020	10	19	1
21.4031	48.1333	nnatrix	0	na	na	2020-10-09	2020	10	19	1
21.4031	48.1334	nnatrix	0	na	na	2020-10-09	2020	10	19	1
21.4031	48.1334	nnatrix	0	na	na	2020-10-09	2020	10	19	1
21.4034	48.1331	nnatrix	205	subadult	na	2020-10-09	2020	10	19	1
21.4034	48.1331	nnatrix	0	na	na	2020-10-09	2020	10	19	1
21.4033	48.1331	nnatrix	0	na	na	2020-10-09	2020	10	19	1
21.4033	48.1332	nnatrix	0	na	na	2020-10-09	2020	10	19	1
21.4033	48.1332	nnatrix	680	adult	f	2020-10-09	2020	10	19	1
21.4033	48.1332	nnatrix	360	adult	m	2020-10-09	2020	10	19	1
21.4032	48.1332	nnatrix	0	na	na	2020-10-09	2020	10	19	1
21.4032	48.1333	nnatrix	500	adult	m	2020-10-09	2020	10	19	1
21.4032	48.1333	nnatrix	365	adult	na	2020-10-09	2020	10	19	1
21.4032	48.1333	ntessellata	180	young	na	2020-10-09	2020	10	19	1
21.4031	48.1333	nnatrix	0	na	na	2020-10-09	2020	10	19	1
21.4031	48.1334	nnatrix	340	adult	na	2020-10-09	2020	10	19	1
21.4031	48.1334	nnatrix	0	na	na	2020-10-09	2020	10	20	1
21.4031	48.1334	nnatrix	0	na	na	2020-10-09	2020	10	20	1
21.403	48.1334	nnatrix	0	na	na	2020-10-09	2020	10	20	1
21.403	48.1335	nnatrix	0	na	na	2020-10-09	2020	10	20	1
21.403	48.1335	nnatrix	0	na	na	2020-10-09	2020	10	20	1
21.403	48.1335	nnatrix	0	na	na	2020-10-09	2020	10	20	1
21.4031	48.1335	nnatrix	0	na	na	2020-10-09	2020	10	20	1
21.403	48.1335	ntessellata	310	adult	na	2020-10-09	2020	10	20	1
21.4029	48.1336	nnatrix	0	na	na	2020-10-09	2020	10	20	1
21.4029	48.1336	ntessellata	650	adult	f	2020-10-09	2020	10	20	1
21.4029	48.1337	nnatrix	340	adult	m	2020-10-09	2020	10	20	1
21.4029	48.1338	nnatrix	420	adult	na	2020-10-09	2020	10	20	1
21.4028	48.1339	nnatrix	380	adult	na	2020-10-09	2020	10	20	1
21.4028	48.1339	nnatrix	0	na	na	2020-10-09	2020	10	20	1
21.4027	48.134	nnatrix	0	na	na	2020-10-09	2020	10	20	1
21.4028	48.134	nnatrix	0	na	na	2020-10-09	2020	10	20	1
21.4026	48.134	nnatrix	0	na	na	2020-10-09	2020	10	20	1
21.4026	48.134	nnatrix	340	adult	m	2020-10-09	2020	10	20	1
21.4027	48.1341	nnatrix	330	adult	na	2020-10-09	2020	10	20	1
21.4026	48.1342	nnatrix	0	na	na	2020-10-09	2020	10	20	1
21.4026	48.1343	nnatrix	275	subadult	na	2020-10-09	2020	10	20	1
21.4026	48.1344	nnatrix	480	adult	na	2020-10-09	2020	10	20	1
21.401	48.1377	nnatrix	390	adult	na	2020-10-09	2020	10	20	1
21.4009	48.1377	nnatrix	0	na	na	2020-10-09	2020	10	20	1
21.4009	48.1377	nnatrix	0	na	na	2020-10-09	2020	10	20	1
21.4009	48.1377	nnatrix	0	na	na	2020-10-09	2020	10	20	1
21.4009	48.1379	nnatrix	410	adult	f	2020-10-09	2020	10	20	1
21.4007	48.1382	nnatrix	0	na	na	2020-10-09	2020	10	20	1
21.4007	48.1382	nnatrix	0	na	na	2020-10-09	2020	10	20	1
21.4007	48.1382	nnatrix	0	na	na	2020-10-09	2020	10	20	1
21.3996	48.1401	nnatrix	0	na	na	2020-10-09	2020	10	20	1
21.3996	48.1402	nnatrix	0	na	na	2020-10-09	2020	10	20	1
21.3995	48.1402	nnatrix	0	na	na	2020-10-09	2020	10	20	1
21.3995	48.1403	nnatrix	0	na	na	2020-10-09	2020	10	20	1
21.3995	48.1402	nnatrix	0	na	na	2020-10-09	2020	10	20	1
21.3995	48.1403	nnatrix	0	na	na	2020-10-09	2020	10	20	1
21.3995	48.1403	nnatrix	0	na	na	2020-10-09	2020	10	20	1
21.3996	48.1401	nnatrix	0	na	na	2020-10-09	2020	10	20	1
21.3995	48.1402	nnatrix	0	na	na	2020-10-09	2020	10	20	1
21.3995	48.1403	nnatrix	0	na	na	2020-10-09	2020	10	20	1
21.3994	48.1404	nnatrix	0	na	na	2020-10-09	2020	10	20	1
21.3995	48.1403	nnatrix	0	na	na	2020-10-09	2020	10	20	1
21.3994	48.1403	nnatrix	0	na	na	2020-10-09	2020	10	20	1
21.3995	48.1403	nnatrix	0	na	na	2020-10-09	2020	10	20	1
21.3994	48.1404	nnatrix	0	na	na	2020-10-09	2020	10	20	1
21.3994	48.1404	nnatrix	0	na	na	2020-10-09	2020	10	20	1
21.3994	48.1404	nnatrix	0	na	na	2020-10-09	2020	10	20	1
21.3995	48.1402	nnatrix	0	na	na	2020-10-09	2020	10	20	1
21.3995	48.1403	nnatrix	345	adult	f	2020-10-09	2020	10	20	1
21.3996	48.1402	nnatrix	260	subadult	na	2020-10-09	2020	10	20	1
21.3995	48.1401	nnatrix	370	adult	na	2020-10-09	2020	10	20	1
21.3995	48.1401	nnatrix	360	adult	f	2020-10-09	2020	10	20	1
21.3995	48.1402	nnatrix	325	adult	f	2020-10-09	2020	10	20	1
21.3996	48.1402	nnatrix	370	adult	m	2020-10-09	2020	10	20	1
21.3996	48.1402	nnatrix	320	adult	na	2020-10-09	2020	10	20	1
21.3995	48.1402	nnatrix	345	adult	m	2020-10-09	2020	10	20	1
21.3994	48.1402	nnatrix	370	adult	m	2020-10-09	2020	10	20	1
21.3995	48.1403	nnatrix	415	adult	na	2020-10-09	2020	10	20	1
21.3995	48.1403	nnatrix	310	adult	m	2020-10-09	2020	10	20	1
21.3995	48.1403	nnatrix	210	subadult	na	2020-10-09	2020	10	20	1
21.3994	48.1403	nnatrix	410	adult	m	2020-10-09	2020	10	20	1
21.3978	48.1411	nnatrix	0	na	na	2020-10-09	2020	10	21	1
21.3978	48.1411	nnatrix	0	na	na	2020-10-09	2020	10	21	1
21.3975	48.1412	nnatrix	0	na	na	2020-10-09	2020	10	21	1
21.3974	48.1413	nnatrix	0	na	na	2020-10-09	2020	10	21	1
21.3973	48.1413	nnatrix	0	na	na	2020-10-09	2020	10	21	1
21.3972	48.1413	nnatrix	0	na	na	2020-10-09	2020	10	21	1
21.3972	48.1414	nnatrix	0	na	na	2020-10-09	2020	10	21	1
21.3971	48.1414	nnatrix	0	na	na	2020-10-09	2020	10	21	1
21.397	48.1414	nnatrix	0	na	na	2020-10-09	2020	10	21	1
21.3969	48.1414	nnatrix	0	na	na	2020-10-09	2020	10	21	1
21.3969	48.1414	nnatrix	0	na	na	2020-10-09	2020	10	21	1
21.3968	48.1415	nnatrix	0	na	na	2020-10-09	2020	10	21	1
21.3967	48.1415	nnatrix	0	na	na	2020-10-09	2020	10	21	1
21.3968	48.1415	nnatrix	570	adult	f	2020-10-09	2020	10	21	1
21.3969	48.1415	nnatrix	610	adult	f	2020-10-09	2020	10	21	1
21.3969	48.1414	nnatrix	330	adult	na	2020-10-09	2020	10	21	1
21.397	48.1413	nnatrix	0	na	na	2020-10-09	2020	10	21	1
21.3971	48.1414	nnatrix	360	adult	m	2020-10-09	2020	10	21	1
21.3971	48.1414	nnatrix	370	adult	m	2020-10-09	2020	10	21	1
21.3971	48.1414	nnatrix	210	subadult	na	2020-10-09	2020	10	21	1
21.3971	48.1413	nnatrix	290	subadult	na	2020-10-09	2020	10	21	1
21.3971	48.1413	nnatrix	0	na	na	2020-10-09	2020	10	21	1
21.3971	48.1413	nnatrix	220	subadult	na	2020-10-09	2020	10	21	1
21.3971	48.1413	nnatrix	360	adult	f	2020-10-09	2020	10	21	1
21.3971	48.1413	nnatrix	350	adult	m	2020-10-09	2020	10	21	1
21.3971	48.1413	nnatrix	390	adult	f	2020-10-09	2020	10	21	1
21.3971	48.1413	nnatrix	320	adult	m	2020-10-09	2020	10	21	1
21.3967	48.1415	nnatrix	0	na	na	2020-10-09	2020	10	21	1
21.3966	48.1415	nnatrix	0	na	na	2020-10-09	2020	10	21	1
21.3966	48.1415	nnatrix	0	na	na	2020-10-09	2020	10	21	1
21.3966	48.1415	nnatrix	0	na	na	2020-10-09	2020	10	21	1
21.3965	48.1415	nnatrix	0	na	na	2020-10-09	2020	10	21	1
21.3964	48.1416	nnatrix	0	na	na	2020-10-09	2020	10	21	1
21.3963	48.1416	nnatrix	0	na	na	2020-10-09	2020	10	21	1
21.3963	48.1416	nnatrix	0	na	na	2020-10-09	2020	10	21	1
21.3963	48.1416	nnatrix	0	na	na	2020-10-09	2020	10	21	1
21.3965	48.1416	nnatrix	0	na	na	2020-10-09	2020	10	21	1
21.3962	48.1417	nnatrix	0	na	na	2020-10-09	2020	10	21	1
21.3961	48.1417	nnatrix	0	na	na	2020-10-09	2020	10	21	1
21.3961	48.1416	nnatrix	335	adult	na	2020-10-09	2020	10	21	1
21.3962	48.1417	nnatrix	285	subadult	na	2020-10-09	2020	10	21	1
21.3962	48.1417	nnatrix	345	adult	m	2020-10-09	2020	10	21	1
21.3962	48.1417	nnatrix	330	adult	m	2020-10-09	2020	10	21	1
21.3963	48.1416	nnatrix	530	adult	f	2020-10-09	2020	10	21	1
21.3964	48.1416	nnatrix	190	young	na	2020-10-09	2020	10	21	1
21.3964	48.1416	nnatrix	160	young	na	2020-10-09	2020	10	21	1
21.3965	48.1416	nnatrix	500	adult	f	2020-10-09	2020	10	21	1
21.3965	48.1416	nnatrix	330	adult	na	2020-10-09	2020	10	21	1
21.3965	48.1416	nnatrix	220	subadult	na	2020-10-09	2020	10	21	1
21.3966	48.1416	nnatrix	480	adult	f	2020-10-09	2020	10	21	1
21.3967	48.1415	ntessellata	300	subadult	m	2020-10-09	2020	10	21	1
21.3967	48.1415	nnatrix	195	young	na	2020-10-09	2020	10	21	1
21.3954	48.142	nnatrix	255	subadult	na	2020-10-09	2020	10	21	1
21.3956	48.1419	nnatrix	0	na	na	2020-10-09	2020	10	21	1
21.3956	48.1419	nnatrix	0	na	na	2020-10-09	2020	10	21	1
21.3957	48.1419	nnatrix	0	na	na	2020-10-09	2020	10	21	1
21.3958	48.1418	nnatrix	170	young	na	2020-10-09	2020	10	21	1
21.3959	48.1417	nnatrix	0	na	na	2020-10-09	2020	10	21	1
21.3798	48.1468	ntessellata	0	na	na	2020-10-09	2020	10	23	1
21.3801	48.1476	nnatrix	295	subadult	na	2020-10-09	2020	10	23	1
21.3799	48.1476	nnatrix	310	adult	na	2020-10-09	2020	10	23	1
21.3799	48.1476	nnatrix	0	na	na	2020-10-09	2020	10	23	1
21.3795	48.1475	nnatrix	180	young	na	2020-10-09	2020	10	23	1
21.3791	48.1474	nnatrix	0	na	na	2020-10-09	2020	10	23	1
21.3791	48.1474	nnatrix	430	adult	m	2020-10-09	2020	10	23	1
21.3791	48.1474	nnatrix	0	na	na	2020-10-09	2020	10	23	1
21.379	48.1474	ntessellata	370	adult	na	2020-10-09	2020	10	23	1
21.379	48.1474	nnatrix	350	adult	f	2020-10-09	2020	10	23	1
21.3789	48.1474	nnatrix	0	na	na	2020-10-09	2020	10	23	1
21.3789	48.1474	nnatrix	0	na	na	2020-10-09	2020	10	23	1
21.3786	48.1474	nnatrix	0	na	na	2020-10-09	2020	10	23	1
21.3778	48.1476	nnatrix	0	na	na	2020-10-09	2020	10	23	1
21.3769	48.1478	nnatrix	430	adult	m	2020-10-09	2020	10	23	1
21.3769	48.1478	nnatrix	0	na	na	2020-10-09	2020	10	23	1
21.3766	48.1478	nnatrix	0	na	na	2020-10-09	2020	10	23	1
21.3764	48.1479	nnatrix	0	na	na	2020-10-09	2020	10	23	1
21.3763	48.1479	nnatrix	0	na	na	2020-10-09	2020	10	23	1
21.3763	48.1479	nnatrix	0	na	na	2020-10-09	2020	10	23	1
21.3758	48.1481	nnatrix	0	na	na	2020-10-09	2020	10	23	1
21.3752	48.1484	nnatrix	0	na	na	2020-10-09	2020	10	23	1
21.3752	48.1484	nnatrix	0	na	na	2020-10-09	2020	10	23	1
21.3652	48.1683	nnatrix	0	na	na	2020-10-09	2020	10	27	1
21.3653	48.1683	ntessellata	0	na	na	2020-10-09	2020	10	27	1
21.3649	48.1684	nnatrix	0	na	na	2020-10-09	2020	10	27	1
21.3648	48.1685	ntessellata	190	young	na	2020-10-09	2020	10	27	1
21.3646	48.1686	ntessellata	170	young	na	2020-10-09	2020	10	27	1
21.3645	48.1687	ntessellata	170	young	na	2020-10-09	2020	10	27	1
21.3643	48.1687	nnatrix	0	na	na	2020-10-09	2020	10	27	1
21.3635	48.1691	nnatrix	0	na	na	2020-10-09	2020	10	27	1
21.3634	48.1692	ntessellata	0	na	na	2020-10-09	2020	10	27	1
21.4043	48.2221	nnatrix	0	na	na	2020-10-09	2020	10	37	1
21.3919	48.2117	ntessellata	0	na	na	2020-10-09	2020	10	52	1
21.3513	48.12	nnatrix	0	na	na	2020-10-22	2020	10	8	0
21.3514	48.1198	nnatrix	0	na	na	2020-10-22	2020	10	8	0
21.3703	48.1024	nnatrix	410	adult	na	2020-10-22	2020	10	12	0
21.3942	48.1053	nnatrix	290	subadult	na	2020-10-22	2020	10	14	0
21.4064	48.1317	nnatrix	0	na	na	2020-10-22	2020	10	19	1
21.4063	48.1317	nnatrix	0	na	na	2020-10-22	2020	10	19	1
21.406	48.1318	nnatrix	0	na	na	2020-10-22	2020	10	19	1
21.406	48.1319	nnatrix	0	na	na	2020-10-22	2020	10	19	1
21.4059	48.1319	nnatrix	0	na	na	2020-10-22	2020	10	19	1
21.4059	48.1319	nnatrix	430	adult	na	2020-10-22	2020	10	19	1
21.4058	48.132	nnatrix	550	adult	f	2020-10-22	2020	10	19	1
21.4054	48.1322	nnatrix	380	adult	na	2020-10-22	2020	10	19	1
21.4052	48.1323	nnatrix	0	na	na	2020-10-22	2020	10	19	1
21.4033	48.1329	nnatrix	0	na	na	2020-10-22	2020	10	19	1
21.4031	48.1332	nnatrix	0	na	na	2020-10-22	2020	10	19	1
21.4031	48.1332	nnatrix	0	na	na	2020-10-22	2020	10	19	1
21.4032	48.1332	nnatrix	380	adult	m	2020-10-22	2020	10	19	1
21.4031	48.1334	nnatrix	0	na	na	2020-10-22	2020	10	20	1
21.4031	48.1334	nnatrix	610	adult	f	2020-10-22	2020	10	20	1
21.403	48.1335	nnatrix	0	na	na	2020-10-22	2020	10	20	1
21.403	48.1335	nnatrix	0	na	na	2020-10-22	2020	10	20	1
21.403	48.1336	nnatrix	0	na	na	2020-10-22	2020	10	20	1
21.403	48.1336	nnatrix	0	na	na	2020-10-22	2020	10	20	1
21.403	48.1336	nnatrix	0	na	na	2020-10-22	2020	10	20	1
21.4029	48.1336	nnatrix	180	young	na	2020-10-22	2020	10	20	1
21.4029	48.1337	nnatrix	180	young	na	2020-10-22	2020	10	20	1
21.4029	48.1337	nnatrix	0	na	na	2020-10-22	2020	10	20	1
21.4029	48.1337	nnatrix	190	young	na	2020-10-22	2020	10	20	1
21.4029	48.1337	nnatrix	0	na	na	2020-10-22	2020	10	20	1
21.4028	48.1337	nnatrix	0	na	na	2020-10-22	2020	10	20	1
21.4028	48.1338	nnatrix	170	young	na	2020-10-22	2020	10	20	1
21.4027	48.1341	nnatrix	0	na	na	2020-10-22	2020	10	20	1
21.4026	48.1343	nnatrix	0	na	na	2020-10-22	2020	10	20	1
21.4018	48.1357	nnatrix	0	na	na	2020-10-22	2020	10	20	1
21.4019	48.1357	nnatrix	0	na	na	2020-10-22	2020	10	20	1
21.4019	48.1357	nnatrix	0	na	na	2020-10-22	2020	10	20	1
21.4019	48.1357	nnatrix	0	na	na	2020-10-22	2020	10	20	1
21.4019	48.1358	nnatrix	0	na	na	2020-10-22	2020	10	20	1
21.4019	48.1357	nnatrix	0	na	na	2020-10-22	2020	10	20	1
21.4009	48.1378	nnatrix	0	na	na	2020-10-22	2020	10	20	1
21.4009	48.1378	nnatrix	0	na	na	2020-10-22	2020	10	20	1
21.4	48.1397	nnatrix	0	na	na	2020-10-22	2020	10	20	1
21.3999	48.1397	nnatrix	0	na	na	2020-10-22	2020	10	20	1
21.3999	48.1397	nnatrix	330	adult	m	2020-10-22	2020	10	20	1
21.3999	48.1398	nnatrix	0	na	na	2020-10-22	2020	10	20	1
21.3998	48.1397	nnatrix	205	subadult	na	2020-10-22	2020	10	20	1
21.3996	48.1402	nnatrix	380	adult	na	2020-10-22	2020	10	20	1
21.3996	48.1402	nnatrix	470	adult	na	2020-10-22	2020	10	20	1
21.3996	48.1402	nnatrix	280	subadult	na	2020-10-22	2020	10	20	1
21.3996	48.1402	nnatrix	400	adult	m	2020-10-22	2020	10	20	1
21.3996	48.1402	nnatrix	310	adult	m	2020-10-22	2020	10	20	1
21.3996	48.1402	nnatrix	0	na	na	2020-10-22	2020	10	20	1
21.3995	48.1403	nnatrix	0	na	na	2020-10-22	2020	10	20	1
21.3983	48.1409	nnatrix	0	na	na	2020-10-22	2020	10	21	1
21.3984	48.1409	nnatrix	0	na	na	2020-10-22	2020	10	21	1
21.3983	48.141	nnatrix	0	na	na	2020-10-22	2020	10	21	1
21.3982	48.141	nnatrix	0	na	na	2020-10-22	2020	10	21	1
21.3982	48.141	nnatrix	0	na	na	2020-10-22	2020	10	21	1
21.3982	48.141	nnatrix	0	na	na	2020-10-22	2020	10	21	1
21.3981	48.141	nnatrix	0	na	na	2020-10-22	2020	10	21	1
21.3983	48.141	nnatrix	0	na	na	2020-10-22	2020	10	21	1
21.3981	48.141	nnatrix	0	na	na	2020-10-22	2020	10	21	1
21.3982	48.1409	nnatrix	0	na	na	2020-10-22	2020	10	21	1
21.3983	48.1409	nnatrix	0	na	na	2020-10-22	2020	10	21	1
21.3977	48.1412	nnatrix	0	na	na	2020-10-22	2020	10	21	1
21.3974	48.1412	nnatrix	0	na	na	2020-10-22	2020	10	21	1
21.3974	48.1412	nnatrix	0	na	na	2020-10-22	2020	10	21	1
21.3974	48.1412	nnatrix	0	na	na	2020-10-22	2020	10	21	1
21.397	48.1414	nnatrix	0	na	na	2020-10-22	2020	10	21	1
21.3971	48.1414	nnatrix	0	na	na	2020-10-22	2020	10	21	1
21.3971	48.1414	nnatrix	0	na	na	2020-10-22	2020	10	21	1
21.397	48.1414	nnatrix	0	na	na	2020-10-22	2020	10	21	1
21.3969	48.1414	nnatrix	0	na	na	2020-10-22	2020	10	21	1
21.3971	48.1414	nnatrix	210	subadult	na	2020-10-22	2020	10	21	1
21.3969	48.1414	nnatrix	340	adult	m	2020-10-22	2020	10	21	1
21.3968	48.1414	nnatrix	0	na	na	2020-10-22	2020	10	21	1
21.3967	48.1415	nnatrix	640	adult	f	2020-10-22	2020	10	21	1
21.3965	48.1415	nnatrix	390	adult	m	2020-10-22	2020	10	21	1
21.3964	48.1416	nnatrix	0	na	na	2020-10-22	2020	10	21	1
21.3962	48.1416	nnatrix	0	na	na	2020-10-22	2020	10	21	1
21.396	48.1417	nnatrix	0	na	na	2020-10-22	2020	10	21	1
21.3959	48.1418	nnatrix	0	na	na	2020-10-22	2020	10	21	1
21.3952	48.1421	nnatrix	215	subadult	na	2020-10-22	2020	10	21	1
21.38	48.1476	nnatrix	0	na	na	2020-10-22	2020	10	23	1
21.38	48.1476	nnatrix	0	na	na	2020-10-22	2020	10	23	1
21.3799	48.1476	nnatrix	0	na	na	2020-10-22	2020	10	23	1
21.3795	48.1475	nnatrix	0	na	na	2020-10-22	2020	10	23	1
21.3794	48.1475	nnatrix	0	na	na	2020-10-22	2020	10	23	1
21.379	48.1474	nnatrix	0	na	na	2020-10-22	2020	10	23	1
21.379	48.1474	nnatrix	180	young	na	2020-10-22	2020	10	23	1
21.3789	48.1474	nnatrix	200	young	na	2020-10-22	2020	10	23	1
21.3788	48.1474	nnatrix	0	na	na	2020-10-22	2020	10	23	1
21.3789	48.1474	nnatrix	0	na	na	2020-10-22	2020	10	23	1
21.3788	48.1474	nnatrix	0	na	na	2020-10-22	2020	10	23	1
21.3788	48.1474	nnatrix	0	na	na	2020-10-22	2020	10	23	1
21.3788	48.1474	nnatrix	0	na	na	2020-10-22	2020	10	23	1
21.3789	48.1474	nnatrix	0	na	na	2020-10-22	2020	10	23	1
21.3785	48.1474	nnatrix	180	young	na	2020-10-22	2020	10	23	1
21.3779	48.1475	nnatrix	0	na	na	2020-10-22	2020	10	23	1
21.3778	48.1475	nnatrix	320	adult	na	2020-10-22	2020	10	23	1
21.3776	48.1476	ntessellata	210	subadult	na	2020-10-22	2020	10	23	1
21.3766	48.1478	ntessellata	270	subadult	na	2020-10-22	2020	10	23	1
21.3765	48.1478	nnatrix	300	subadult	na	2020-10-22	2020	10	23	1
21.3764	48.1478	nnatrix	235	subadult	na	2020-10-22	2020	10	23	1
21.3764	48.1478	nnatrix	350	adult	na	2020-10-22	2020	10	23	1
21.3758	48.1481	nnatrix	0	na	na	2020-10-22	2020	10	23	1
21.3758	48.1481	nnatrix	300	subadult	na	2020-10-22	2020	10	23	1
21.3753	48.1484	nnatrix	430	adult	na	2020-10-22	2020	10	23	1
21.3752	48.1484	ntessellata	310	adult	na	2020-10-22	2020	10	23	1
21.3752	48.1484	nnatrix	330	adult	na	2020-10-22	2020	10	23	1
21.3752	48.1485	nnatrix	520	adult	m	2020-10-22	2020	10	23	1
21.3748	48.1486	nnatrix	220	subadult	na	2020-10-22	2020	10	23	1
21.3683	48.1491	nnatrix	0	na	na	2020-10-22	2020	10	24	1
21.3632	48.1527	nnatrix	0	na	na	2020-10-22	2020	10	25	1
21.3629	48.1535	nnatrix	320	adult	na	2020-10-22	2020	10	25	1
21.3645	48.1686	nnatrix	370	adult	m	2020-10-22	2020	10	27	1
21.3677	48.1887	nnatrix	520	adult	f	2020-10-22	2020	10	31	1
21.3689	48.1895	nnatrix	510	adult	na	2020-10-22	2020	10	31	1
21.3911	48.2057	ntessellata	430	adult	m	2020-10-22	2020	10	35	1
21.3938	48.2103	nnatrix	520	adult	m	2020-10-22	2020	10	35	1
21.3938	48.2103	nnatrix	0	na	na	2020-10-22	2020	10	35	1
21.3941	48.2109	ntessellata	340	adult	m	2020-10-22	2020	10	35	1
21.3964	48.2143	nnatrix	350	adult	na	2020-10-22	2020	10	36	1
21.3975	48.2156	nnatrix	0	na	na	2020-10-22	2020	10	36	1
21.4129	48.2292	ntessellata	440	adult	na	2020-10-22	2020	10	38	1
21.4161	48.2314	nnatrix	370	adult	m	2020-10-22	2020	10	39	1
21.4187	48.2334	nnatrix	640	adult	f	2020-10-22	2020	10	39	1
21.4171	48.0997	nnatrix	0	na	na	2020-10-22	2020	10	40	0
21.4165	48.0861	nnatrix	400	adult	m	2020-10-22	2020	10	42	0
21.3684	48.1819	nnatrix	190	young	na	2020-10-22	2020	10	46	1
21.3738	48.1872	nnatrix	180	young	na	2020-10-22	2020	10	47	1
na	na	na	na	na	na	na	na	na	1	0
na	na	na	na	na	na	na	na	na	1	0
na	na	na	na	na	na	na	na	na	1	0
na	na	na	na	na	na	na	na	na	1	0
na	na	na	na	na	na	na	na	na	1	0
na	na	na	na	na	na	na	na	na	1	0
na	na	na	na	na	na	na	na	na	2	0
na	na	na	na	na	na	na	na	na	2	0
na	na	na	na	na	na	na	na	na	2	0
na	na	na	na	na	na	na	na	na	2	0
na	na	na	na	na	na	na	na	na	2	0
na	na	na	na	na	na	na	na	na	2	0
na	na	na	na	na	na	na	na	na	2	0
na	na	na	na	na	na	na	na	na	2	0
na	na	na	na	na	na	na	na	na	2	0
na	na	na	na	na	na	na	na	na	3	0
na	na	na	na	na	na	na	na	na	3	0
na	na	na	na	na	na	na	na	na	4	0
na	na	na	na	na	na	na	na	na	4	0
na	na	na	na	na	na	na	na	na	4	0
na	na	na	na	na	na	na	na	na	4	0
na	na	na	na	na	na	na	na	na	4	0
na	na	na	na	na	na	na	na	na	4	0
na	na	na	na	na	na	na	na	na	4	0
na	na	na	na	na	na	na	na	na	4	0
na	na	na	na	na	na	na	na	na	5	0
na	na	na	na	na	na	na	na	na	5	0
na	na	na	na	na	na	na	na	na	5	0
na	na	na	na	na	na	na	na	na	5	0
na	na	na	na	na	na	na	na	na	5	0
na	na	na	na	na	na	na	na	na	6	0
na	na	na	na	na	na	na	na	na	6	0
na	na	na	na	na	na	na	na	na	6	0
na	na	na	na	na	na	na	na	na	6	0
na	na	na	na	na	na	na	na	na	6	0
na	na	na	na	na	na	na	na	na	6	0
na	na	na	na	na	na	na	na	na	6	0
na	na	na	na	na	na	na	na	na	6	0
na	na	na	na	na	na	na	na	na	6	0
na	na	na	na	na	na	na	na	na	7	0
na	na	na	na	na	na	na	na	na	7	0
na	na	na	na	na	na	na	na	na	7	0
na	na	na	na	na	na	na	na	na	7	0
na	na	na	na	na	na	na	na	na	7	0
na	na	na	na	na	na	na	na	na	7	0
na	na	na	na	na	na	na	na	na	7	0
na	na	na	na	na	na	na	na	na	7	0
na	na	na	na	na	na	na	na	na	7	0
na	na	na	na	na	na	na	na	na	10	0
na	na	na	na	na	na	na	na	na	10	0
na	na	na	na	na	na	na	na	na	11	0
na	na	na	na	na	na	na	na	na	11	0
na	na	na	na	na	na	na	na	na	11	0
na	na	na	na	na	na	na	na	na	11	0
na	na	na	na	na	na	na	na	na	11	0
na	na	na	na	na	na	na	na	na	12	0
na	na	na	na	na	na	na	na	na	12	0
na	na	na	na	na	na	na	na	na	12	0
na	na	na	na	na	na	na	na	na	13	0
na	na	na	na	na	na	na	na	na	13	0
na	na	na	na	na	na	na	na	na	13	0
na	na	na	na	na	na	na	na	na	13	0
na	na	na	na	na	na	na	na	na	13	0
na	na	na	na	na	na	na	na	na	13	0
na	na	na	na	na	na	na	na	na	14	0
na	na	na	na	na	na	na	na	na	15	0
na	na	na	na	na	na	na	na	na	15	0
na	na	na	na	na	na	na	na	na	16	0
na	na	na	na	na	na	na	na	na	16	0
na	na	na	na	na	na	na	na	na	16	0
na	na	na	na	na	na	na	na	na	16	0
na	na	na	na	na	na	na	na	na	16	0
na	na	na	na	na	na	na	na	na	16	0
na	na	na	na	na	na	na	na	na	16	0
na	na	na	na	na	na	na	na	na	16	0
na	na	na	na	na	na	na	na	na	17	0
na	na	na	na	na	na	na	na	na	17	0
na	na	na	na	na	na	na	na	na	17	0
na	na	na	na	na	na	na	na	na	17	0
na	na	na	na	na	na	na	na	na	17	0
na	na	na	na	na	na	na	na	na	17	0
na	na	na	na	na	na	na	na	na	17	0
na	na	na	na	na	na	na	na	na	17	0
na	na	na	na	na	na	na	na	na	17	0
na	na	na	na	na	na	na	na	na	17	0
na	na	na	na	na	na	na	na	na	18	1
na	na	na	na	na	na	na	na	na	18	1
na	na	na	na	na	na	na	na	na	18	1
na	na	na	na	na	na	na	na	na	18	1
na	na	na	na	na	na	na	na	na	18	1
na	na	na	na	na	na	na	na	na	19	1
na	na	na	na	na	na	na	na	na	19	1
na	na	na	na	na	na	na	na	na	19	1
na	na	na	na	na	na	na	na	na	19	1
na	na	na	na	na	na	na	na	na	21	1
na	na	na	na	na	na	na	na	na	23	1
na	na	na	na	na	na	na	na	na	25	1
na	na	na	na	na	na	na	na	na	26	1
na	na	na	na	na	na	na	na	na	26	1
na	na	na	na	na	na	na	na	na	26	1
na	na	na	na	na	na	na	na	na	26	1
na	na	na	na	na	na	na	na	na	26	1
na	na	na	na	na	na	na	na	na	26	1
na	na	na	na	na	na	na	na	na	26	1
na	na	na	na	na	na	na	na	na	26	1
na	na	na	na	na	na	na	na	na	27	1
na	na	na	na	na	na	na	na	na	27	1
na	na	na	na	na	na	na	na	na	27	1
na	na	na	na	na	na	na	na	na	28	1
na	na	na	na	na	na	na	na	na	28	1
na	na	na	na	na	na	na	na	na	28	1
na	na	na	na	na	na	na	na	na	28	1
na	na	na	na	na	na	na	na	na	28	1
na	na	na	na	na	na	na	na	na	28	1
na	na	na	na	na	na	na	na	na	28	1
na	na	na	na	na	na	na	na	na	28	1
na	na	na	na	na	na	na	na	na	29	1
na	na	na	na	na	na	na	na	na	29	1
na	na	na	na	na	na	na	na	na	29	1
na	na	na	na	na	na	na	na	na	29	1
na	na	na	na	na	na	na	na	na	29	1
na	na	na	na	na	na	na	na	na	29	1
na	na	na	na	na	na	na	na	na	29	1
na	na	na	na	na	na	na	na	na	29	1
na	na	na	na	na	na	na	na	na	30	1
na	na	na	na	na	na	na	na	na	30	1
na	na	na	na	na	na	na	na	na	30	1
na	na	na	na	na	na	na	na	na	30	1
na	na	na	na	na	na	na	na	na	30	1
na	na	na	na	na	na	na	na	na	30	1
na	na	na	na	na	na	na	na	na	30	1
na	na	na	na	na	na	na	na	na	30	1
na	na	na	na	na	na	na	na	na	30	1
na	na	na	na	na	na	na	na	na	30	1
na	na	na	na	na	na	na	na	na	31	1
na	na	na	na	na	na	na	na	na	31	1
na	na	na	na	na	na	na	na	na	31	1
na	na	na	na	na	na	na	na	na	31	1
na	na	na	na	na	na	na	na	na	31	1
na	na	na	na	na	na	na	na	na	32	1
na	na	na	na	na	na	na	na	na	32	1
na	na	na	na	na	na	na	na	na	32	1
na	na	na	na	na	na	na	na	na	32	1
na	na	na	na	na	na	na	na	na	33	1
na	na	na	na	na	na	na	na	na	33	1
na	na	na	na	na	na	na	na	na	33	1
na	na	na	na	na	na	na	na	na	33	1
na	na	na	na	na	na	na	na	na	34	1
na	na	na	na	na	na	na	na	na	34	1
na	na	na	na	na	na	na	na	na	34	1
na	na	na	na	na	na	na	na	na	34	1
na	na	na	na	na	na	na	na	na	36	1
na	na	na	na	na	na	na	na	na	36	1
na	na	na	na	na	na	na	na	na	37	1
na	na	na	na	na	na	na	na	na	38	1
na	na	na	na	na	na	na	na	na	40	0
na	na	na	na	na	na	na	na	na	40	0
na	na	na	na	na	na	na	na	na	40	0
na	na	na	na	na	na	na	na	na	40	0
na	na	na	na	na	na	na	na	na	40	0
na	na	na	na	na	na	na	na	na	41	0
na	na	na	na	na	na	na	na	na	41	0
na	na	na	na	na	na	na	na	na	41	0
na	na	na	na	na	na	na	na	na	41	0
na	na	na	na	na	na	na	na	na	42	0
na	na	na	na	na	na	na	na	na	42	0
na	na	na	na	na	na	na	na	na	42	0
na	na	na	na	na	na	na	na	na	42	0
na	na	na	na	na	na	na	na	na	42	0
na	na	na	na	na	na	na	na	na	42	0
na	na	na	na	na	na	na	na	na	42	0
na	na	na	na	na	na	na	na	na	42	0
na	na	na	na	na	na	na	na	na	43	0
na	na	na	na	na	na	na	na	na	43	0
na	na	na	na	na	na	na	na	na	43	0
na	na	na	na	na	na	na	na	na	44	0
na	na	na	na	na	na	na	na	na	44	0
na	na	na	na	na	na	na	na	na	44	0
na	na	na	na	na	na	na	na	na	45	1
na	na	na	na	na	na	na	na	na	45	1
na	na	na	na	na	na	na	na	na	45	1
na	na	na	na	na	na	na	na	na	46	1
na	na	na	na	na	na	na	na	na	47	1
na	na	na	na	na	na	na	na	na	47	1
na	na	na	na	na	na	na	na	na	47	1
na	na	na	na	na	na	na	na	na	48	1
na	na	na	na	na	na	na	na	na	49	1
na	na	na	na	na	na	na	na	na	49	1
na	na	na	na	na	na	na	na	na	49	1
na	na	na	na	na	na	na	na	na	49	1
na	na	na	na	na	na	na	na	na	49	1
na	na	na	na	na	na	na	na	na	49	1
na	na	na	na	na	na	na	na	na	49	1
na	na	na	na	na	na	na	na	na	49	1
na	na	na	na	na	na	na	na	na	49	1
na	na	na	na	na	na	na	na	na	49	1
na	na	na	na	na	na	na	na	na	50	1
na	na	na	na	na	na	na	na	na	50	1
na	na	na	na	na	na	na	na	na	51	1
na	na	na	na	na	na	na	na	na	53	1
na	na	na	na	na	na	na	na	na	53	1
na	na	na	na	na	na	na	na	na	53	1
na	na	na	na	na	na	na	na	na	53	1
na	na	na	na	na	na	na	na	na	54	1
na	na	na	na	na	na	na	na	na	54	1
na	na	na	na	na	na	na	na	na	54	1
na	na	na	na	na	na	na	na	na	55	1
na	na	na	na	na	na	na	na	na	55	1
na	na	na	na	na	na	na	na	na	55	1
na	na	na	na	na	na	na	na	na	55	1
na	na	na	na	na	na	na	na	na	55	1
na	na	na	na	na	na	na	na	na	55	1
na	na	na	na	na	na	na	na	na	56	1
na	na	na	na	na	na	na	na	na	56	1
na	na	na	na	na	na	na	na	na	56	1
na	na	na	na	na	na	na	na	na	56	1
na	na	na	na	na	na	na	na	na	56	1
na	na	na	na	na	na	na	na	na	56	1
na	na	na	na	na	na	na	na	na	56	1
na	na	na	na	na	na	na	na	na	56	1
na	na	na	na	na	na	na	na	na	57	1
na	na	na	na	na	na	na	na	na	57	1
na	na	na	na	na	na	na	na	na	57	1
na	na	na	na	na	na	na	na	na	57	1
na	na	na	na	na	na	na	na	na	57	1
na	na	na	na	na	na	na	na	na	57	1
na	na	na	na	na	na	na	na	na	57	1
na	na	na	na	na	na	na	na	na	58	1
na	na	na	na	na	na	na	na	na	58	1
na	na	na	na	na	na	na	na	na	58	1
na	na	na	na	na	na	na	na	na	58	1
