# Supplementary material for: Road mortality of water snakes in light of landscape structure and traffic intensity in north-eastern Hungary
Source: PeerJ journal article supplement (doi:10.7717/peerj.17923), 2024-09-26
Supplement: szabolcsetal_snakeroad_supplementary2.xlsx [file szabolcsetal_snakeroad_supplementary2.xlsx]

## Sheet: Munka1
flood	section	nnatrix	ntessellata	traffic	Buildings	Paved roads	Dirt roads	Railways	Other artificial areas	Urban forests	Urban green areas	Arable land	Vineyards	Fruit plantations	Complex cultivation patterns	Salt steppes	Closed mountain grasslands	Other herbaceous vegetation	Sessile oak-hornbeam forests	Riverine willow-poplar forests	Non-native tree plantations	Mixed woodlands	Tall marsh vegetation standing in water	Wet meadows with periodic flooding	Lakes	Rivers
0	1	2	0	4710	66	651	24	239	35	28	639	6134	3384	1595	4	1357	1928	263	39	83	1094	913	736	425	0	5
0	2	1	0	4710	55	424	11	268	20	28	370	5938	3547	1339	26	3531	799	246	25	83	909	386	1139	482	0	0
0	3	15	1	4710	113	229	23	168	40	189	637	5472	2052	967	22	4261	1268	188	107	0	885	674	1457	513	0	0
0	4	1	0	4710	411	463	29	141	53	246	1679	3966	2638	468	22	3869	1071	169	107	0	461	995	1364	297	0	0
0	5	7	0	4710	941	754	28	140	92	337	2687	2640	3912	163	22	2699	1687	248	107	0	476	1106	950	254	0	0
0	6	0	1	4710	1273	1048	25	195	159	597	4397	1960	3597	138	70	2202	1671	323	39	0	63	792	801	337	37	0
0	7	1	0	5591	1191	1003	9	217	192	566	4750	2209	3766	56	49	1507	1615	373	0	36	0	859	962	414	37	3
0	8	42	0	7888	920	767	18	221	204	466	3561	4067	3577	262	49	277	1211	482	111	36	0	2327	914	373	37	5
0	9	31	0	8120	295	357	26	198	151	336	2014	6867	2496	678	45	0	1493	581	124	191	0	2341	1254	462	151	27
0	10	12	0	8120	42	162	32	161	13	31	430	7932	2406	702	0	214	1576	566	252	191	0	2037	1073	482	313	40
0	11	8	0	8120	47	234	35	152	13	25	385	7002	2878	862	203	310	1558	629	463	155	0	2184	741	391	249	51
0	12	16	0	8120	46	232	24	150	13	29	391	7702	2594	948	343	310	1662	549	409	99	15	1928	564	353	38	50
0	13	6	0	8120	110	476	19	165	27	51	623	8250	2561	437	398	302	1264	510	307	0	49	1693	670	486	0	57
0	14	42	0	8120	406	875	22	211	46	261	1444	6706	3208	356	451	0	1026	424	364	0	113	1639	586	526	0	47
0	15	21	0	8120	859	1279	19	200	83	457	2438	4146	2781	409	479	0	1319	339	296	13	111	1693	450	637	0	372
0	16	2	0	8120	1012	1486	13	198	111	1032	3053	2864	2083	300	331	0	1419	332	0	151	105	1946	623	1181	0	931
0	17	0	0	8120	1407	1688	10	183	137	1411	3421	1068	1601	45	170	0	847	421	2	687	293	3131	618	1614	0	1462
1	18	6	2	4612	1054	1179	7	125	139	1372	2147	450	975	46	126	0	360	418	0	846	218	5130	2496	1589	0	1545
1	19	202	13	4320	629	633	12	0	111	978	1345	221	608	53	218	0	425	414	0	884	70	6622	3096	1272	0	1277
1	20	197	15	4039	556	522	12	0	77	791	985	155	830	48	278	0	707	406	0	964	339	6364	3902	2117	16	880
1	21	187	4	3328	191	255	12	0	57	524	689	155	1477	43	276	0	1135	391	0	735	1175	4966	3449	2149	16	965
1	22	42	0	3328	125	249	12	0	7	268	498	573	2024	71	350	0	1246	439	0	559	1358	4640	2561	2763	16	970
1	23	111	34	3328	99	258	17	0	5	141	493	2017	2089	327	277	0	1405	487	0	180	1569	3536	2155	2627	31	665
1	24	41	1	3328	323	398	13	0	8	139	1133	3184	2709	390	223	0	1389	507	0	163	1478	2852	1319	1553	29	529
1	25	25	1	4620	514	542	26	0	12	360	1842	4175	4018	432	198	0	1046	468	90	11	1080	2152	1116	1336	29	649
1	26	1	1	4973	782	650	57	0	32	482	2811	2670	2309	212	143	0	422	208	90	220	1133	1745	2010	3050	29	706
1	27	28	53	4958	968	840	56	130	207	663	3551	2231	1095	136	40	0	211	229	90	220	1098	1579	2084	2740	29	770
1	28	1	0	3639	862	856	81	157	346	667	3439	3121	2573	198	34	0	450	278	125	154	272	1869	730	1644	29	617
1	29	1	0	1369	667	869	88	183	341	604	3244	3681	4006	200	39	0	649	324	159	0	154	1759	229	887	0	539
1	30	0	0	802	659	946	97	186	311	658	3767	2876	4317	145	22	0	640	347	90	0	0	1413	894	1165	1	814
1	31	8	1	802	519	838	95	174	121	654	3663	2319	4761	124	10	0	726	387	110	0	95	1410	1270	1277	1	936
1	32	6	0	802	276	698	86	133	9	589	2992	1470	5166	90	11	0	711	320	234	0	142	1918	1481	1779	1	928
1	33	5	1	802	187	567	51	134	10	511	2323	827	4236	125	11	0	1086	349	353	4	134	2771	2059	2494	2	839
1	34	12	8	802	200	496	55	132	11	498	2522	379	3321	239	18	0	813	311	372	67	98	3247	3295	2364	1	670
1	35	56	18	802	190	448	67	145	19	363	2364	1539	2396	635	26	0	1054	334	429	133	181	3303	2997	2705	0	576
1	36	17	4	802	119	426	55	149	13	181	1873	4096	1549	698	26	0	864	390	360	301	574	3058	2025	2343	0	427
1	37	20	7	1134	108	400	55	148	8	147	2059	6335	818	693	17	0	521	305	23	358	426	1636	1942	2828	0	503
1	38	18	9	1170	208	469	32	143	11	59	1892	7525	40	490	12	0	288	356	0	384	532	1584	1357	2972	5	681
1	39	8	3	1170	386	474	31	133	15	69	1957	5888	0	485	13	0	200	293	0	275	1016	1492	1299	2628	5	686
0	40	14	0	944	974	1448	40	163	110	1002	3093	4236	1608	185	180	0	1558	294	0	530	219	1641	1359	1324	1893	1154
0	41	13	0	624	468	655	50	0	42	332	1671	7725	0	146	0	0	1552	265	0	729	257	639	1930	1199	1965	845
0	42	8	0	624	1	253	46	0	8	18	215	9812	0	144	0	107	1260	335	0	400	768	411	2708	1047	1971	338
0	43	10	0	624	43	216	41	0	0	29	395	9923	0	0	9	567	2361	319	0	4	700	190	2846	808	836	38
0	44	9	0	624	228	364	18	0	3	138	1381	7001	0	0	69	588	3416	255	0	57	1210	310	3399	1082	139	21
1	45	18	10	984	943	1025	91	174	189	752	4175	3160	1830	152	40	0	445	325	90	154	250	1351	2075	2331	30	989
1	46	25	13	500	688	919	98	177	187	773	3920	2093	1958	50	30	0	539	356	86	77	32	1031	2933	2556	7	1043
1	47	16	5	500	358	746	81	144	8	657	3291	1694	2943	45	10	0	501	293	0	0	0	1275	3902	2243	7	1021
1	48	2	2	500	227	574	52	115	9	527	2533	863	3043	45	12	0	462	243	0	0	0	1140	3358	2211	8	883
1	49	9	1	7764	310	687	80	161	15	72	2085	11750	2198	1776	96	0	618	301	0	0	426	989	532	1135	41	1
1	50	19	1	8110	104	420	82	140	8	148	1987	8712	1329	1279	136	0	964	291	111	2	474	1375	842	1314	33	44
1	51	26	0	8110	120	450	76	142	13	186	1865	5274	2165	860	137	0	1226	431	361	15	575	3237	1426	1155	0	163
1	52	19	2	8110	178	448	81	142	18	355	2345	1792	3020	672	26	0	1199	381	441	61	184	3696	2590	2243	0	456
1	53	28	2	8110	204	490	53	132	12	493	2513	376	3397	296	18	0	843	298	500	58	101	3420	3043	2207	0	633
1	54	8	1	8110	178	556	55	130	10	497	2190	702	4445	140	14	0	1205	367	455	4	185	3303	1516	2051	0	731
1	55	5	0	8110	238	654	78	130	9	560	2763	1279	5640	90	12	0	1138	315	406	0	169	2666	778	1218	1	837
1	56	6	0	8110	348	785	107	154	18	613	3250	2299	6438	127	10	0	857	392	118	0	118	1704	371	675	1	806
1	57	2	0	8110	496	787	84	172	194	515	3127	2467	6325	94	8	0	1066	381	63	0	41	1898	157	291	1	571
1	58	5	0	8110	610	834	79	189	341	502	3000	3502	6658	173	9	0	1192	303	319	0	277	2336	10	0	0	231
