# Supplementary material for: Road mortality of water snakes in light of landscape structure and traffic intensity in north-eastern Hungary
Source: PeerJ journal article supplement (doi:10.7717/peerj.17923), 2024-09-26
Supplement: szabolcsetal_snakeroad_supplementary3.xlsx [file szabolcsetal_snakeroad_supplementary3.xlsx]

## Sheet: Munka1
original code	original name	name
1110	Low buildings	Buildings
1120	High buildings	Buildings
1210	Paved roads	Paved roads
1220	Dirt roads	Dirt roads
1230	Railways	Railways
1310	Other paved or non-paved artificial areas	Other artificial areas
1410	Green urban areas with trees	Urban forests
1420	Green urban areas without trees	Urban green areas
2100	Arable land	Arable land
2210	Vineyards	Vineyards
2220	Fruit and berry, and other plantations	Fruit plantations
2310	Complex cultivation patterns with scattered buildings	Complex cultivation patterns
2320	Complex cultivation patterns without buildings	Complex cultivation patterns
3200	Salt steppes and meadows (grasslands affected by salinisation included)	Salt steppes
3320	Siliceous open rocky grasslands	Closed mountain grasslands
3400	Closed grasslands in hills and mountains or on cohesive soil	Closed mountain grasslands
3500	Other herbaceous vegetation	Other herbaceous vegetation
4102	Sessile oak-hornbeam forests	Sessile oak-hornbeam forests
4104	Downy oak forests	Sessile oak-hornbeam forests
4107	Native poplar dominated forests	Sessile oak-hornbeam forests
4108	Pioneer forests of hilly and mountainous regions	Sessile oak-hornbeam forests
4110	Pedunculate oak forests, monospecific or mixed with ash	Sessile oak-hornbeam forests
4111	Forests dominated by other native tree species (without excess water)	Sessile oak-hornbeam forests
4112	Other mixed deciduous forests	Sessile oak-hornbeam forests
4201	Riverine willow-poplar woodlands	Riverine willow-poplar forests
4202	Riverine hardwood forests	Riverine willow-poplar forests
4304	Willow woods outside the floodplain	Riverine willow-poplar forests
4305	Poplar woods outside the floodplain	Riverine willow-poplar forests
4401	Conifer-dominated plantations	Non-native tree plantations
4402	Black locust-dominated mixed plantations	Non-native tree plantations
4403	Plantations dominated by non-native poplar and willow species	Non-native tree plantations
4404	Plantations of other non-native tree species	Non-native tree plantations
4501	Clearcut	Mixed woodlands
4502	Forest stand under regeneration	Mixed woodlands
4600	Other ligneous vegetation, woodlands	Mixed woodlands
5110	Tall-herb vegetation of marshes and fens standing in water	Tall marsh vegetation standing in water
5120	Fens and mesotrophic wet meadows, grasslands with periodic water effect	Wet meadows with periodic flooding
6100	Water bodies	Lakes
6200	Water courses	Rivers
